28 **GRAPHICAL ABSTRACT**

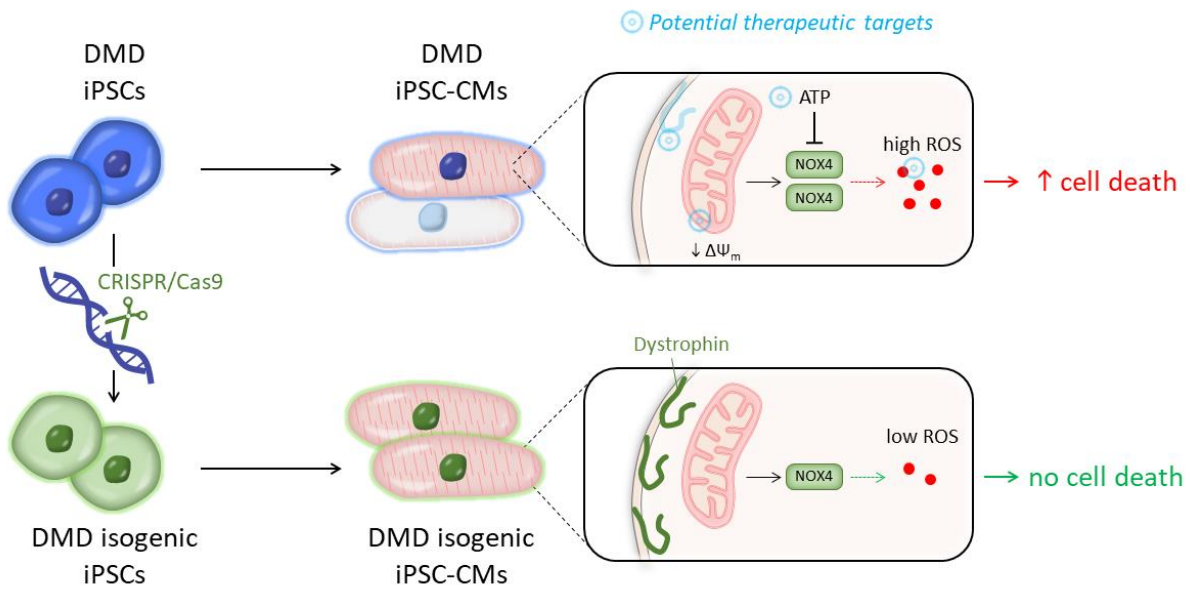

29

30 **The use of human induced pluripotent stem cell-derived cardiomyocytes (iPSC-CMs)**  
31 **from Duchenne muscular dystrophy (DMD) patients to model cardiomyopathic features**  
32 **in DMD and unravel novel pathological mechanistic insights.** DMD iPSC-CMs showed  
33 accelerated cell death, caused by increased intracellular reactive oxygen species (ROS) levels.  
34 By intervention at different target sites, beneficial effects on the mitochondrial membrane  
35 potential ( $\Delta\Psi_m$ ) and the expression and ROS-producing activity of the cardiac-specific  
36 NADPH-oxidase 4 isoform (NOX4) were observed, resulting in an increased cell survival and  
37 function of DMD iPSC-CMs.

## 38 **ABSTRACT**

39 Duchenne muscular dystrophy (DMD) is an X-linked progressive muscle disorder, caused by  
40 mutations in the *Dystrophin* gene. Cardiomyopathy is one of the major causes of early death.  
41 In this study, we used DMD patient-specific induced pluripotent stem cells (iPSCs) to model  
42 cardiomyopathic features in DMD and unravel novel pathological mechanistic insights.  
43 Cardiomyocytes (CMs) differentiated from DMD iPSCs showed enhanced premature cell  
44 death, due to significantly elevated intracellular reactive oxygen species (ROS) concentrations,  
45 as a result of depolarized mitochondria and high NADPH oxidase 4 (NOX4) protein levels.  
46 Genetic correction of *Dystrophin* through CRISPR/Cas9 editing restored normal ROS levels.  
47 Application of ROS reduction by N-acetyl-L-cysteine (NAC), partial Dystrophin re-expression  
48 by ataluren (PTC124) and enhancing mitochondrial electron transport chain function by  
49 idebenone improved cell survival of DMD iPSC-CMs. We show applications that could  
50 counteract the detrimental oxidative stress environment in DMD iPSC-CMs by stimulating  
51 adenosine triphosphate (ATP) production. ATP could bind to the ATP-binding domain in the  
52 NOX4 enzyme, and we demonstrate that ATP resulted in partial inhibition of the NADPH-  
53 dependent ROS production of NOX4.  
54 Considering the complexity and the early cellular stress responses in DMD cardiomyopathy,  
55 we propose to target ROS production and prevent the detrimental effects of NOX4 on DMD  
56 CMs as a promising therapeutic strategy.

57

58 **Keywords:** Duchenne muscular dystrophy, cardiomyopathy, iPSC modeling, CRISPR/Cas9,  
59 NADPH oxidase NOX4.

60

61 **Teaser:** Increased NOX4 activity in DMD iPSC-CMs could be counteracted by idebenone-  
62 stimulated ATP production.

## 63 INTRODUCTION

64 The shortage of human cardiac cell sources has challenged cardiovascular disease modeling  
65 and drug development. The generation of functional cardiomyocytes (CMs) differentiated from  
66 human induced pluripotent stem cells (iPSCs) overcomes current limitations and offers an  
67 extraordinary platform to develop iPSC-based models to study the genetic disease phenotype  
68 of cardiomyopathic pathologies *in vitro* (1, 2).

69 Mutations in the *Dystrophin* gene cause the X-linked disorder Duchenne muscular  
70 dystrophy (DMD), the most common and severe phenotype among the muscular dystrophies  
71 (3). Most DMD patients develop adverse myocardial remodeling and chronic cardiomyopathy,  
72 a major cause of morbidity and early mortality (4). With current standards of care, the median  
73 life expectancy at birth in DMD seems to have improved considerably during the last decades,  
74 ranged between 21.0 and 39.6 years (5).

75 The Dystrophin protein has a crucial role during muscle contraction and stretch. Loss of  
76 function or absence lead to myocyte sarcolemma instability during contraction-relaxation  
77 cycles, making myocytes more susceptible to stretch-induced damage and necrosis (6). The  
78 signaling-mediated role of Dystrophin and the associated dystrophin glycoprotein complex is  
79 not yet fully understood (7). The pathophysiological role of Dystrophin in the heart is poorly  
80 defined and little is known about the earliest stages of DMD cardiomyopathy. Multiple  
81 pathways are involved including dysregulation of calcium ( $\text{Ca}^{2+}$ ) homeostasis, oxidative stress,  
82 inflammation and functional ischemia.

83 Oxidative stress is involved in the pathogenesis of heart failure. However, clinical trials  
84 using antioxidants have shown limited success (8, 9). Nicotinamide adenine dinucleotide  
85 phosphate (NADPH) oxidase (NOX) family enzymes generate reactive oxygen species (ROS)  
86 in a highly regulated manner, modulating several physiological aspects such as host defense,  
87 posttranslational processing of proteins, cellular signaling, regulation of gene expression and

88 cell differentiation (10, 11). However, NOX family enzymes also contribute to a wide range of  
89 pathological processes, in particular cardiovascular diseases (12-16). The NOX4 isoform is  
90 predominantly expressed in CMs, although the precise location remains controversial. It is  
91 constitutively active at low level (17), inducing cardioprotective effects under chronic stress  
92 (18). The exact role of NOX4 in CMs is still not clear, even though high levels of NOX4 could  
93 have severe detrimental effects (12-16). Targeting NOX isoforms may be a useful therapeutic  
94 strategy. Therefore, there has been significant focus on the potential role of ROS-generating  
95 NOX isoform proteins in the pathogenesis of DMD (14, 15, 19).

96         Several innovative therapeutic approaches focus on targeting the primary defect such as  
97 restoring the function or expression of Dystrophin through exon skipping (20), ribosomal read-  
98 through technology (21), as well as gene (22) and cell therapy (23). Recent technological  
99 breakthroughs in genome editing successfully enabled the correction of the genetic mutation  
100 (24, 25). In addition, compounds targeting downstream pathophysiology are under investigation  
101 in clinical trials (26). Idebenone (2,3-dimethoxy-5-methyl-6-(10-hydroxy)decyl-1,4-  
102 benzoquinone), a synthetic analogue of coenzyme Q<sub>10</sub>, has a dual mode-of-action. First, it  
103 detoxifies ROS by donating electrons to produce non-toxic reaction products. Second, it donates  
104 electrons directly to Complex III of the mitochondrial electron transport chain (ETC), which  
105 restores electron flow, proton pumping activity of Complexes III and IV, and adenosine  
106 triphosphate (ATP) production by Complex V. Phase 2 and phase 3 randomized placebo-  
107 controlled trials have demonstrated a beneficial role of idebenone in DMD patients (27, 28).

108         In this study, we used DMD patient-specific iPSC-derived CMs (iPSC-CMs) to model  
109 cardiomyopathic features in DMD and to explore pathological mechanisms. We observed  
110 mitochondrial dysfunction and increased concentrations of intracellular ROS in DMD iPSC-  
111 CMs, due to significantly increased expression and activity of NOX4. These features were not  
112 present in CRISPR/Cas9 genetically corrected DMD isogenic iPSC-CMs. Additionally, by

113 administration of the ROS scavenger N-acetyl-L-cysteine (NAC), the read-through chemical  
114 drug ataluren (PTC124) or the synthetic benzoquinone idebenone to differentiated DMD iPSC-  
115 CMs, we observed beneficial outcomes regarding cell survival and function. Interestingly,  
116 idebenone showed superior improvements compared to NAC and PTC124 alone or in  
117 combination. In addition, our data indicated that idebenone counteracted the hyperactive ROS-  
118 producing activity of the cardiac-specific NOX4 isoform through a mechanism mediated by  
119 ATP production that could reduce NOX4 activity, resulting in an improved contractile function.

120 In conclusion, using DMD patient-derived iPSCs, we established an *in vitro* model to  
121 recapitulate DMD heart disease phenotypes and to study novel molecular disease mechanisms  
122 that might become interesting therapeutic targets for cardiomyopathy in DMD patients.

## 123 **RESULTS**

### 124 *Generation of Integration-Free DMD iPSCs*

125 To obtain an unlimited cell source of CMs, recapitulating aspects of a single-gene disease  
126 phenotype, iPSC lines were generated from human dermal fibroblasts (hFs) and human  
127 peripheral blood mononuclear cells (hPBMCs) obtained from DMD patients with known  
128 *Dystrophin* mutations (Table S1). Somatic cells were reprogrammed towards a pluripotent state  
129 using the integration-free Sendai virus (SeV) vectors (Fig. S1A-C), which expressed the OSKM  
130 (OCT3/4, SOX2, KLF4 and c-MYC) pluripotency markers. Subcutaneously injected DMD  
131 iPSC lines into immunodeficient mice displayed teratoma formation, successfully showing the  
132 differentiation capacity into all three developmental germ layers (ectoderm, mesoderm and  
133 endoderm; Fig. S1D-E). Furthermore, detailed pluripotency analysis for related genes and  
134 proteins is given in Supplemental Information (Fig. S2A-B). Three human control iPSC lines  
135 were used, generated from healthy donors with no neuromuscular disorders (Table S1).

136

### 137 *CRISPR/Cas9-Mediated Correction of Nonsense Mutation in Dystrophin Gene*

138 Additionally, we created an isogenic control line to exclude genetic background variability. The  
139 isogenic control line was generated using CRISPR/Cas9 technology from the DMD iPSC  
140 patient line, characterized by a genetic point mutation in exon 35 (c.4,996C > T; p.Arg1,666X)  
141 of the *Dystrophin* gene, resulting in a premature stop codon and consequently in the complete  
142 absence of a functional Dystrophin protein (Fig. 1A). To restore full-length expression of the  
143 *Dystrophin* gene, two 20-nucleotide single-guide RNAs (sgRNAs) were designed to induce  
144 Cas9-mediated double-stranded breaks (DSB) in the genomic DNA of the Dystrophin-deficient  
145 iPSCs (Fig. 1B). SgRNA specificity and CRISPR/Cas9 DSB cutting were evaluated in  
146 HEK293T cells by the appearance of non-homologous end joining (NHEJ) events after  
147 transfection of the sgRNA-Cas9 plasmids (Fig. S3A-B). Cas9-mediated genome editing was

148 performed via homology-directed repair (HDR), using a plasmid-based donor repair template  
149 with homology arm regions for the *Dystrophin* gene exon of interest, in order to substitute the  
150 premature stop codon into the original amino acid codon for arginine (Fig. 1B). Sequencing  
151 analysis of exon 35 of the *Dystrophin* gene confirmed CRISPR/Cas9-mediated genomic  
152 correction, further indicated as DMD isogenic control (Fig. 1C). CRISPR/Cas9 off-target  
153 events were analyzed based on sequence homology of sgRNAs (Fig. S3C) and detailed  
154 comparative genomic hybridization (CGH) molecular karyotyping did not show additional  
155 chromosomal abnormalities due to unwanted Cas9-mediated DSB cuts (Fig. S3D). To  
156 demonstrate that gene editing did not influence the pluripotency state of the DMD isogenic  
157 control, pluripotency genes (*c-MYC*, *GDF-3*, *KLF4*, *NANOG*, *OCT4*, *REX1*, *SOX2* and *hTERT*)  
158 and proteins (OCT4, NANOG, SSEA4, SOX2, TRA-1-60 and LIN28) were analyzed in several  
159 undifferentiated human pluripotent stem cell (PSC) lines (Fig. S2A-B). Furthermore,  
160 immunofluorescent staining showed the expression of Dystrophin protein levels (green) in  
161 differentiated DMD iPSC-CMs (cTnT, red and Hoechst, blue) after CRISPR/Cas9 correction  
162 (Fig. 1D).

163

#### 164 ***Human iPSC-CMs to Model Diseased Heart Phenotype in DMD***

165 Burrige *et al.* developed a fully chemically defined and small molecule based cardiac  
166 differentiation protocol, effective for several human iPSC lines and with high yield of mainly  
167 ventricular-like CMs (29). Here, we differentiated control and DMD iPSC lines to CMs,  
168 according to this monolayer-based cardiac differentiation strategy (29), with additional 3D  
169 maturation in fibrin-based engineered heart tissue (EHT) constructs (Fig. 2A-B) (30). During  
170 the early phases of cardiac differentiation, human iPSCs were treated with chemical Wnt  
171 signaling mediators (CHIR99021 and IWR-1) to obtain high CM yields (Fig. 2A). Additional  
172 3D maturation of iPSC-CMs could significantly increase the expression of the cardiac-specific



173 maturation isoforms *MYL2* and *TNNI3* (Fig. 2C). Immunostaining of cTnT positive iPSC-CMs  
174 additionally matured in 3D EHTs showed structural aligned orientation due to mechanical  
175 loading of the flexible microposts compared to classical 2D monolayer-based differentiation  
176 systems (Fig. 2D). Importantly, differentiated iPSC-CMs from DMD patients manifested  
177 pathologic features of cardiac involvement. They exhibited a significant reduction of the L-type  
178  $\text{Ca}^{2+}$  current, indicating abnormal  $\text{Ca}^{2+}$  homeostasis (Fig. 2E), and representative action  
179 potential (AP) recordings from DMD iPSC-CMs displayed arrhythmogenic firing pattern  
180 including delayed afterdepolarizations (DADs) and oscillatory prepotentials (OPPs; Fig. 2F),  
181 as reported in literature by Eisen *et al.* and others (31-36). Furthermore, detailed patch-clamp  
182 recordings at day 24 of differentiation showed significant longer mean action potential duration  
183 at 90% repolarization (APD90) of DMD iPSC-CMs compared to control iPSC-CMs (Fig. 2G).  
184 Other electrophysiological parameters including AP amplitude, resting membrane potential  
185 (RMP), cell capacitance and beating frequency did not show significant differences (Fig. 2H).  
186

### 187 ***Enhanced Cell Death and Excessive Intracellular ROS Levels in DMD iPSC-CM Cultures***

188 The absence of Dystrophin protein in differentiated iPSC-CMs from DMD patients (Fig. S4)  
189 results in progressive loss of CMs (6, 32). In this study, we wanted to identify novel  
190 pathological cues that caused decreased cell survival of DMD iPSC-CMs. We mainly used the  
191 DMD iPSC patient line that was characterized by the nonsense mutation in exon 35 (c.4,996C  
192 > T; p.Arg1,666X) of the *Dystrophin* gene (DMD #2 in Table S1). This DMD line represents a  
193 subgroup of DMD patients (approximately 13%) that is responsive to the read-through chemical  
194 drug ataluren (PTC124; Fig. 5A-C). Cell death was examined by flow cytometric analyses,  
195 using annexin V and 7-amino-actinomycin D (7AAD). DMD iPSC-CMs underwent accelerated  
196 cell death (DMD, early apoptosis:  $15 \pm 1\%$  and late apoptosis:  $33 \pm 6\%$ ) compared to  
197 corresponding DMD isogenic (isoC, respectively  $3 \pm 0\%$  and  $7 \pm 1\%$ ) and healthy controls (HC,

198 respectively  $5 \pm 0\%$  and  $15 \pm 1\%$ ; Fig. 3A and Fig. S6A, *left panels*). A remarkable percentage  
199 of DMD iPSC-CMs had high intracellular ROS concentrations (DMD,  $[\text{ROS}]^{\text{high}}$ :  $68 \pm 2\%$ )  
200 compared to controls (isoC,  $[\text{ROS}]^{\text{high}}$ :  $46 \pm 3\%$  and HC,  $[\text{ROS}]^{\text{high}}$ :  $41 \pm 1\%$ ; Fig. 3B and Fig.  
201 S6A, *middle panels*). Moreover, the intracellular ROS content (mean fluorescence intensity,  
202 MFI) in DMD iPSC-CMs was significantly higher (DMD,  $28,924 \pm 1,864$  vs. isoC,  $5,276 \pm 254$   
203 and vs. HC,  $6,198 \pm 213$ ; Fig. 3C and Fig. S6A, *right panels*). Upon treatment with NAC and  
204 PTC124 (alone or in combination) as well with idebenone, DMD iPSC-CMs showed increased  
205 cell survival (DMD early apoptosis, NAC:  $7 \pm 1\%$ , PTC124:  $8 \pm 1\%$ , NAC+PTC124:  $9 \pm 1\%$   
206 and idebenone:  $3 \pm 0\%$  vs. untreated:  $15 \pm 1\%$  and DMD late apoptosis, NAC:  $25 \pm 2\%$ ,  
207 PTC124:  $24 \pm 2\%$ , NAC+PTC124:  $21 \pm 2\%$  and idebenone:  $5 \pm 1\%$  vs. untreated:  $33 \pm 6\%$ ;  
208 Fig. 3A and Fig. S6A, *left panels*) and reduced intracellular ROS levels (DMD  $[\text{ROS}]^{\text{high}}$ , NAC:  
209  $36 \pm 4\%$ , PTC124:  $41 \pm 11\%$ , NAC+PTC124:  $48 \pm 7\%$  and idebenone:  $52 \pm 3\%$  vs. untreated:  
210  $68 \pm 2\%$ ; Fig. 3B and Fig. S6A, *middle panels*) compared to untreated DMD iPSC-CMs. The  
211 specificity of the drug effect on the CM death and on the intracellular ROS levels of the  
212 experimental groups is shown in Supplemental Information (Fig. S7A-D). Taken together, these  
213 results show increased intracellular ROS levels in DMD iPSC-CMs. Interestingly, NAC,  
214 PTC124 and idebenone had beneficial effects on the cell survival, although idebenone addition  
215 exhibited superior effects on DMD iPSC-CM cultures.

216

### 217 ***Dystrophin-Deficient iPSC-CMs Are Characterized by Depolarized Mitochondria***

218 DMD pathology is accompanied by abnormal intracellular  $\text{Ca}^{2+}$  handling and the accumulation  
219 of dysfunctional mitochondria with defective structure (31-38). A distinctive feature of early  
220 phase cell death is the loss of the membrane potential of active mitochondria ( $\Delta\Psi_{\text{m}}$ ) (39). Here,  
221 the carbocyanine compound JC-1, a fluorescent voltage-sensitive dye with membrane-permeant  
222 fluorescent lipophilic cationic properties (40), was used to determine  $\Delta\Psi_{\text{m}}$  in iPSC-CMs and

223 mitochondrial health. Consistently with the previously observed accelerated death of untreated  
224 DMD iPSC-CMs, these cultures were characterized by mitochondrial depolarization, indicated  
225 by the decrease in red (aggregates)/green (monomers) JC-1 fluorescence intensity ratio (DMD,  
226 JC-1 aggregates:  $31 \pm 4\%$  and JC-1 monomers:  $68 \pm 4\%$ ) compared to DMD isogenic (isoC,  
227 respectively  $71 \pm 2\%$  and  $28 \pm 2\%$ ) and healthy controls (HC, respectively  $71 \pm 1\%$  and  $28 \pm$   
228  $2\%$ ; Fig. 3D-E and Fig. S6B). Interestingly, the combinatorial treatment of NAC and PTC124  
229 (DMD NAC+PTC124, JC-1 aggregates:  $60 \pm 4\%$  and JC-1 monomers:  $38 \pm 3\%$ ), as well as  
230 idebenone treatment (DMD idebenone, respectively  $68 \pm 2\%$  and  $32 \pm 3\%$ ) displayed  
231 significantly beneficial effects on  $\Delta\Psi_m$  with respect to untreated DMD iPSC-CMs (DMD  
232 untreated, respectively  $31 \pm 4\%$  and  $68 \pm 4\%$ ). Furthermore, flow cytometric analyses  
233 confirmed a significant increased superoxide production in depolarized mitochondria (DMD,  
234  $75 \pm 6\%$ ) compared to controls (isoC,  $22 \pm 1\%$  and HC,  $30 \pm 5\%$ ; Fig. 3F and Fig. S6C). No  
235 significant differences were observed for mitochondrial content upon the different treatments  
236 (Fig. S6D-E). The specificity of the drug effect on  $\Delta\Psi_m$  and on the mitochondrial superoxide  
237 concentrations of the experimental groups is shown in Supplemental Information (Fig. S8A-  
238 D). Taken together, these results indicate dysfunctional depolarized mitochondria in DMD  
239 iPSC-CMs, which could lead to excessive ROS leakage. The combined treatment of NAC and  
240 PTC124, as well of idebenone to DMD iPSC-CM cultures were able to rescue this condition.

241

#### 242 ***NOX4 Is Overexpressed in DMD iPSC-CMs***

243 Several independent studies have reported increased NOX4 expression and activity in chronic  
244 heart failure, supporting the clinical relevance, although the role of NOX4 in CMs is still  
245 unclear (12-16). Here, the NOX2 and NOX4 isoforms, the predominantly expressed members  
246 of the ROS-producing NOX family in the heart, were investigated. Gene expression profiles  
247 did not reveal differential expression for NOX2 and accessory regulatory subunits (*p47<sup>phox</sup>*,

248 *p67<sup>phox</sup>*, and *RAC2* and *RAC3*; Fig. 4A). Interestingly, *NOX4* and its regulatory subunit *p22<sup>phox</sup>*  
249 were significantly upregulated in DMD iPSC-CMs. Moreover, DMD iPSC-CMs treated with  
250 PTC124 alone or in combination with NAC exhibited decreased *NOX4* and *p22<sup>phox</sup>* gene levels.  
251 In contrast, upon idebenone treatment, no reduction was observed in the expression of both  
252 genes. Flow cytometric analyses demonstrated a significant increased percentage of NOX4  
253 positive DMD iPSC-CMs (DMD, 78 ± 3%) compared to DMD isogenic (isoC, 31 ± 4%) and  
254 healthy controls (HC, 29 ± 1%; Fig. 4B-C). The percentage of NOX4 positive DMD iPSC-CMs  
255 was reduced upon idebenone treatment (DMD idebenone, 34 ± 4% vs. isoC, 31 ± 4% and vs.  
256 HC, 29 ± 1%). The specificity of the drug on the expression of NOX4 among the experimental  
257 groups is shown in Supplemental Information (Fig. S9A-B). Western blot analysis confirmed  
258 significantly increased protein levels of NOX4 in DMD iPSC-CMs. (Fig. 4D). Upon idebenone  
259 addition, DMD iPSC-CMs showed downregulated NOX4 expression like observed in controls.  
260 These data demonstrate a significantly increased NOX4 expression in DMD iPSC-CMs that  
261 upon treatment with idebenone could be reverted to physiological levels.

262         Additionally, we demonstrated that the NOX4 upregulation in DMD iPSC-CMs (DMD  
263 #2 in Table S1) was not a common downstream pathway of cell death. Therefore, we  
264 preincubated iPSC-CMs with 1 μM STS for 6 h, a potent cell death inducer (41), and did not  
265 observe any increase in the NOX4 expression (Fig. S10A-B). Interestingly, by analyzing  $\Delta\Psi_m$   
266 and the mitochondrial superoxide production in various DMD patient-specific iPSC-CM lines  
267 (DMD #2, DMD #5 and DMD #6 in Table S1), we could observe an association between the  
268 levels of mitochondrial depolarization and ROS production with the gene and protein levels of  
269 NOX4, suggesting a crucial role of NOX4 (Fig. S11A-F).

270

271 ***Idebenone Stimulates ATP Production in Depolarized Mitochondria, Ameliorating NOX4-***  
272 ***Mediated ROS Overproduction***

273 Overall, oxidative stress, in synergy with intracellular  $\text{Ca}^{2+}$  overload, results in progressive  
274 worsening of DMD cardiomyopathy (7, 37). We hypothesized that *Dystrophin* gene mutations  
275 elicit excessive ROS generation via the mitochondrial ETC of dysfunctional mitochondria and  
276 a NOX4-based NADPH-dependent process. To assess whether increased NOX4 could  
277 contribute to elevated intracellular ROS concentrations, *NOX4* mRNA levels were transiently  
278 degraded by the addition of Antisense LNA GapmeRs to the DMD iPSC-CM cultures (Fig. 5A,  
279 *left panel*). Antisense LNA GapmeRs targeting *MALAT1* mRNA were used as positive control  
280 (Fig. 5A, *right panel*). Interestingly, transient GapmeR-induced *NOX4* mRNA degradation  
281 significantly reduced the NOX4 activity, monitored through changes in NADPH absorption  
282 (Fig. 5B) (42, 43). DMD iPSC-CMs exhibited significantly elevated NOX4 activity compared  
283 to controls (Fig. 5C). However, when idebenone was added to DMD iPSC-CMs, the NOX4  
284 NADPH-dependent ROS production was significantly reduced in isolated mitochondria (Fig.  
285 5C) and the total CM fraction (Fig. S12A). Moreover, idebenone restored ATP levels due to its  
286 electron donating property for mitochondrial ETC stimulation (Fig. 5D and Fig. S12B).

287         Recent studies have identified an ATP-binding motif within NOX4 through which ATP,  
288 upon binding, could regulate NOX4 activity (43). Adding dose-dependent ATP concentrations  
289 to DMD iPSC-CM cultures demonstrated that 2.5 mM ATP had a beneficial effect and  
290 significantly reduced ROS production of the NOX4 activity in respect to no ATP addition (Fig.  
291 5E and Fig. S12C). Interestingly, idebenone alone or in combination with 2.5 mM ATP addition  
292 did ameliorate the activity of NOX4, in a similar manner, resulting in a significantly decreased  
293 NADPH-dependent ROS production compared to untreated DMD iPSC-CMs (Fig. 5F and Fig.  
294 S12D). The specificity of idebenone on the ROS-producing activity of NOX4 and on the ATP  
295 levels of the experimental groups is shown in Supplemental Information (Fig. S13A-D). These  
296 findings reveal an increased mitochondrial ROS-producing NOX4 activity in DMD iPSC-CMs,  
297 which was counteracted by idebenone application through ATP.

298

299 ***DMD EHTs Show Improved Contractile Function after Idebenone Administration***

300 In order to assess the amplitude of contraction of 3D EHT constructs, we monitored the  
301 micropost deflection movements of the EHT devices as a result of spontaneous contraction of  
302 the EHTs attached to the flexible microposts (Fig. 2B). At physiological 1.8 mM  $\text{Ca}^{2+}$   
303 concentrations, the contractile function of untreated DMD iPSC-CM EHTs was significantly  
304 lower than untreated EHTs generated from isogenic or healthy iPSC-CMs (Fig. 6A), confirming  
305 the validity of the 3D EHT model system for DMD. However, DMD EHTs treated with  
306 idebenone exhibited a significantly increased contraction, whereas the combined treatment of  
307 idebenone and PTC124 improved even further the contractile function. By incubating DMD  
308 EHTs with various  $\text{Ca}^{2+}$  concentrations (ranging from 0.1 to 2.5 mM), we wanted to analyze  
309 the amplitude of contraction of DMD EHTs at physiological  $\text{Ca}^{2+}$  levels (1.8 mM; dotted line)  
310 and higher  $\text{Ca}^{2+}$  levels (2.5 mM), mimicking the detrimental increased  $\text{Ca}^{2+}$  environment, as  
311 reported in the heart from DMD patients (35, 44, 45). At physiological  $\text{Ca}^{2+}$  levels, idebenone  
312 had beneficial effects on the contraction of DMD EHTs compared to untreated DMD EHTs,  
313 whereas the contractile function of DMD EHTs did not show any improvements upon  
314 idebenone administration at 2.5 mM  $\text{Ca}^{2+}$  concentrations (Fig. 6B). However, the contractile  
315 function was significantly improved after the combinatorial treatment of idebenone and  
316 PTC124. These data point out the beneficial effect of a combinatorial treatment of idebenone  
317 and PTC124, highlighting the importance of targeting simultaneously different aspects of DMD  
318 cardiomyopathy in terms of heart functionality.

## 319 **DISCUSSION**

320 Human iPSCs have the potential to differentiate in functional cell types that can be used as  
321 unlimited cell source of inaccessible tissues to study genetic disorders and, consequently, to  
322 gain novel insights in signaling pathways involved in the disease pathology.

323 In this study, we generated iPSC-based cardiac disease models from sample material of  
324 three DMD patients to study the early stages of cardiomyopathy in DMD. Human iPSCs were  
325 differentiated towards CMs according to the protocol of Burridge *et al.* (Nature Methods) (29)  
326 and Breckwoldt *et al.* (Nature Protocols) (30). First, human iPSCs were differentiated in a  
327 monolayer-based method using a fully chemically defined medium, consisting of the basal  
328 medium RPMI 1640, rice-derived recombinant human albumin and L-ascorbic acid 2-  
329 phosphate along with small molecule-based induction of differentiation (29). L-ascorbic acid  
330 2-phosphate has been shown to enhance cardiac differentiation and maturation through  
331 increased collagen production by promoting cardiac progenitor cell proliferation via the MEK-  
332 ERK1/2 pathway. Furthermore, L-ascorbic acid 2-phosphate-induced CMs exhibited better  
333 sarcomeric organization and enhanced responses of APs and Ca<sup>2+</sup> transients to  $\beta$ -adrenergic and  
334 muscarinic stimulations (46). Second, iPSC-CMs were further differentiated in 3D fibrin-based  
335 EHT constructs for contractility measurements (30). In several cancer-related studies the effect  
336 of ascorbic acid on ROS production has been reported (47, 48). In these studies, a ROS-  
337 scavenger effect was observed after the addition of 1 mM or higher concentrations of ascorbic  
338 acid. We used a lower final concentration, suggesting no significant antioxidative effect on ROS  
339 levels. Interestingly, Bartsch *et al.* (49) demonstrated an ascorbic acid enhanced cardiac  
340 differentiation accompanied by an upregulation of the NADPH oxidase isoforms NOX2 and  
341 NOX4 at basal expression levels with intracellular physiological ROS concentrations,  
342 indicating the suitability of the applied cardiac differentiation methods.



343 Human iPSC-CMs obtained from DMD patients represent hallmarks of DMD-  
344 associated heart complications in *in vitro* cultures. Published studies showed that the lack of  
345 Dystrophin in DMD iPSC-CMs resulted in enhanced cell death (32), Ca<sup>2+</sup> handling  
346 abnormalities and reduced contractile function (31, 33-36, 44, 45, 50). We observed premature  
347 cell death of DMD iPSC-CMs due to significantly elevated intracellular oxidative stress levels.  
348 Furthermore, detailed characterization demonstrated mitochondrial depolarization and  
349 significantly increased NOX4 expression. Whether the abnormally upregulated NOX4  
350 expression and its increased basal rate of ROS production are a direct or indirect consequence  
351 of the absence of Dystrophin is currently unknown. Increased Nox4 protein have been found in  
352 left ventricular CMs of *mdx* mice, associated with fibrosis and altered functional parameters in  
353 the heart (14). Deep RNA sequencing of the cardiac transcriptome on explanted human heart  
354 samples, obtained from patients suffering from heart failure, indicated extensive alternative  
355 splicing of the *NOX4* gene, associated with upregulation of the full-length NOX4 protein (15).  
356 In consistency with these results, we found a significantly increased expression and activity of  
357 the cardiac-specific ROS-producing NOX4 isoform in DMD iPSC-CMs. Dystrophin-deficient  
358 CMs are more vulnerable to mechanical stress due to the increased membrane fragility and  
359 stretch-induced Ca<sup>2+</sup> influx, resulting in cell death (32, 35, 44, 45). The complexity of the DMD  
360 pathology results from the signal amplification systems, with bidirectional cross-talk and  
361 positive feed-back loops. ROS generation in response to mechanical forces may originate from  
362 diverse sources including mitochondria and NOX isoforms (12, 13, 16), or even other oxidase  
363 systems (19, 51, 52).

364 To ameliorate the DMD disease phenotype, we applied several therapeutic approaches.  
365 We investigated whether NAC, ataluren (PTC124) and idebenone could have beneficial effects  
366 on the dystrophic features observed in DMD iPSC-CM cultures. PTC124 drug efficacy analyses  
367 were performed only on the DMD iPSC line with the nonsense mutation in exon 35 (c.4,996C



368 > T; p.Arg1,666X) of the *Dystrophin* gene. This line represents a subgroup of DMD patients  
369 (approximately 13%) that is responsive to the read-through chemical drug PTC124, which  
370 allowed us to investigate the effects of PTC124 on DMD cardiomyopathy in an *in vitro* iPSC-  
371 based disease model. PTC124 is one of the gene-based therapeutic approaches for DMD,  
372 although applicable for only a small subgroup of DMD patients with a nonsense mutation (21).  
373 We demonstrated re-expression of Dystrophin after PTC124 addition in a fraction of  
374 differentiating DMD iPSC-CMs. Recently, a phase 3 randomized placebo-controlled trial,  
375 evaluating an improvement in the 6-minute walking test after 48 weeks, has been completed  
376 (53), and a clinical trial to study Dystrophin expression levels in a small cohort of PTC124-  
377 treated patients with DMD is currently ongoing. These clinical studies aim at targeting the  
378 primary cause of DMD progression.

379         Nowadays several innovative therapeutic approaches focus on the secondary pathology.  
380 In the last decade, researchers have shown growing interest for idebenone as potential treatment  
381 for DMD. The precise mechanism by which idebenone exerts its protective effect is still  
382 unknown. Yet, idebenone has been reported to protect mitochondria from oxidative damage  
383 and boost their impaired function, delaying disease progression of DMD (27, 28). Interestingly,  
384 given the dual mode-of-action of idebenone (ROS-scavenger function and stimulation of the  
385 mitochondrial ETC), we showed that idebenone application exhibited a superior beneficial  
386 outcome on DMD iPSC-CMs through increased ATP production that, on its turn, decreased  
387 NOX4 activity. The exact mechanism of ATP-mediated inhibition of the NOX4 activity is still  
388 unclear.

389         Recently, an ATP-binding motif within the NOX4 isoform has been identified,  
390 suggesting a potential novel mechanism through which NOX4 can be allosterically regulated.  
391 During normal respiration, OXPHOS-driven ATP production in the mitochondria binds NOX4  
392 through the ATP-binding domain, keeping the NOX4-produced ROS levels low (43). The ATP-

393 binding motif (AXXXXGKT) (54) that resides within the amino acids 534-541 of the C-  
394 terminus, is unique to NOX4 (not found in other NOX isoforms) and is conserved in *Homo*  
395 *sapiens*, *Rattus norvegicus* and *Mus musculus* (43). In line with these results, we demonstrated  
396 that the addition of idebenone to DMD iPSC-CM cultures increased the intracellular and, more  
397 specifically, the mitochondrial ATP concentrations through idebenone-induced ETC  
398 stimulation. Moreover, idebenone could significantly reduce the ROS-producing NOX4  
399 activity, assuming the allosterically regulation of NOX4 through ATP. Interestingly, the  
400 addition of external ATP to DMD iPSC-CM cultures resulted in a similar reduction of the  
401 NADPH-dependent ROS production of NOX4.

402 Elevated ATP concentrations can be used by skeletal and cardiac myosin to increase  
403 cross-bridge binding and cycling, leading to stronger and faster contraction and relaxation (55).  
404 Cardiac-specific overexpression by means of recombinant adeno-associated viral (rAAV)-  
405 mediated delivery of the enzyme ribonucleotide reductase that converts adenosine diphosphate  
406 (ADP) to deoxy-ADP (dADP), which, on its turn, is rapidly converted to deoxy-ATP (dATP)  
407 in cells, facilitated CM contraction and cardiac performance in normal rodent hearts as well as  
408 in rodent and pig infarcted hearts (56, 57). We showed improved contractile properties of EHTs  
409 derived from DMD iPSC-CMs upon idebenone administration at physiological  $\text{Ca}^{2+}$   
410 concentrations. Preincubation of idebenone with PTC124 further enhanced the contractility,  
411 probably due to the PTC124-induced re-expression of Dystrophin proteins. In line with these  
412 results, the group of Olson performed CRISPR/Cas9-mediated exon skipping (“myoediting”)  
413 for DMD mutation corrections, in order to rescue the contractile dysfunction of DMD iPSC-  
414 CMs that were differentiated in 3D EHTs (44, 45, 58).

415 In conclusion, by using iPSC-CMs from DMD patients, we provided the first evidence  
416 that NOX4 expression and activity was significantly upregulated, contributing to high  
417 intracellular ROS and increased cell death. Furthermore, we compared the effects of the ROS

418 scavenger NAC, the read-through premature termination codon chemical drug PTC124 and  
419 idebenone in an *in vitro* setting of cardiomyopathic DMD. Finally, we gained novel mechanistic  
420 insights in the mode-of-action of idebenone on the hyperactive state of NOX4-mediated ROS  
421 production. Idebenone-mediated stimulation of the ATP production by the ETC of  
422 mitochondria could increase the affinity of ATP to bind with NOX4, reducing the ROS-  
423 producing activity of NOX4. Considering the early cellular stress responses present in iPSC-  
424 CMs from DMD patients, interfering with any of these early cellular events that lead to  
425 excessive ROS signals would positively affect the mitochondrial activity resulting in an  
426 improved contractile function.

## 427 **MATERIALS AND METHODS**

### 428 *Study Design*

429 The objective of this study is to develop a stem cell-based model to investigate pathological  
430 mechanisms and evaluate their therapeutical potential in cardiomyopathy in DMD patients. The  
431 study was conducted in compliance with the principles of the Declaration of Helsinki, the  
432 principles of ‘Good Clinical Practice’ (GCP) and in accordance with all applicable regulatory  
433 requirements. The use of human samples from healthy control donors and DMD subjects for  
434 experimental purposes and protocols in the present study was approved by the Ethics  
435 Committee of the University Hospitals Leuven (respectively, S55438 and S65190). Subjects  
436 information, used in this study, is summarized in Table S1.

437

### 438 *Chemicals and Reagents*

439 NAC (Merck), ataluren (PTC124; Selleckchem) and idebenone (Santhera Pharmaceuticals,  
440 Pratteln Switzerland). Staurosporine (STS; Merck). CM-H<sub>2</sub>DCFDA Total Intracellular ROS  
441 Indicator, JC-1 Mitochondrial Membrane Potential Probe, MitoSOX Red Mitochondrial  
442 Superoxide Indicator and MitoTracker-Red CMXRos Mitochondria Probe (all from Thermo  
443 Fisher Scientific). ATP Solution, Luminescent ATP Detection Assay Kit, Colorimetric NADPH  
444 Assay Kit (both from Abcam) and Mitochondrial Isolation Kit for Cultured Cells (Thermo  
445 Fisher Scientific).

446

### 447 *Generation of Integration-Free DMD iPSCs*

448 hFs and hPBMCs were isolated from DMD patients with known *Dystrophin* mutations (Table  
449 S1). Somatic cells were reprogrammed towards pluripotency using the integration-free SeV-  
450 based technology, performed according to the manufacturer’s instructions (CytoTune-iPS 2.0  
451 Sendai Reprogramming Kit; Thermo Fisher Scientific).

452

453 *Teratoma Formation Assay*

454 Pluripotency of SeV-reprogrammed iPSCs was evaluated *in vivo* in 6- to 8-week-old  
455 immunodeficient *Rag2-null*  $\gamma$ *c-null*/Balb/C mice. Teratoma formation experiments in mice  
456 were conducted following the guidelines of the Animal Welfare Committee of Leuven  
457 University and Belgian/European legislation (approved July 2016; P174/2016).

458

459 *Human iPSC Culture*

460 Human control and DMD diseased iPSC lines (Table S1) were cultured feeder-free on Geltrex  
461 LDEV-Free hESC-Qualified Reduced Growth Factor Basement Membrane Matrix and  
462 maintained in Essential 8 Flex Basal Medium supplemented with Essential 8 Flex Supplement  
463 (50x) and 0.1% Pen/Strep (all from Thermo Fisher Scientific), at 37°C under normoxic  
464 conditions (21% O<sub>2</sub> and 5% CO<sub>2</sub>). Colonies were routinely passaged non-enzymatically with  
465 0.5 mM EDTA in Phosphate-Buffered Saline (PBS; both from Thermo Fisher Scientific).  
466 Mycoplasma contamination was assessed on a periodic basis for all cell cultures. No  
467 contaminated cells were used in the described experiments of this study.

468

469 *Generation of DMD Isogenic Control Line through CRISPR/Cas9 Genome Editing*

470 To restore full-length expression of the *Dystrophin* gene, the isogenic control for the DMD  
471 iPSC patient line, characterized by a genetic point mutation in exon 35 (c.4,996C > T;  
472 p.Arg1,666X) of the *Dystrophin* gene, was generated through CRISPR/Cas9 from the *S.*  
473 *pyogenes* system (5'-NGG PAM) as previously described (59). Briefly, two 20-nucleotide  
474 sgRNAs (sgRNA #1: FW seq. CACCG-ATTTAACCACTCTTCTGCTC and RV seq. AAAC-  
475 GAGCAGAAGAGTGGTTAAAT-C; sgRNA #2: FW seq. CACCG-  
476 TAACCACTCTTCTGCTCAGG and RV seq. AAAC-CCTGAGCAGAAGAGTGGTTA-C)

477 were designed and ligated into the RNA-guided nuclease plasmid (pX330-mCherry plasmid;  
478 Addgene), in order to induce the Cas9-mediated DSB in the genomic DNA of the Dystrophin-  
479 deficient iPSCs. Cas9-mediated genome editing was performed via HDR. The targeted DNA  
480 modification required the use of a plasmid-based donor repair template with two homology arm  
481 regions for the *Dystrophin* gene, flanking a GFP-Hygromycin-TK expressing cassette for  
482 selection. Here, one of the homology arms contained the genetic correction of the nonsense  
483 mutation in the *Dystrophin* gene. Finally, a completely gene editing-free DMD isogenic iPSC  
484 line was obtained due to PiggyBac excision and FIAU selection, restoring the expression of  
485 functional Dystrophin protein (Table S1).

486

#### 487 *Monolayer-Based Cardiac Differentiation of Human iPSCs*

488 Human iPSCs were differentiated into functional CMs according to a monolayer-based cardiac  
489 differentiation protocol, as previously described (29). Briefly, prior to differentiation, control  
490 and DMD iPSC lines were split in small colonies and subsequently cultured on a thin Matrigel  
491 Growth Factor Reduced (GFR) Basement Membrane Matrix layer (Corning) in complete  
492 Essential 8 Flex Medium at 37°C under hypoxic conditions (5% O<sub>2</sub> and 5% CO<sub>2</sub>), in order to  
493 obtain the optimal confluency of 85%, three days after splitting. Mesoderm differentiation (day  
494 0) was induced using 6 μM CHIR99021 (Axon Medchem) for 48 h in a chemically defined  
495 medium consisting of RPMI 1640 (Thermo Fisher Scientific), 500 μg/mL rice-derived  
496 recombinant human albumin and 213 μg/mL L-ascorbic acid 2-phosphate (both from Merck).  
497 After 24 h of CHIR99021 stimulation, iPSCs were transferred from hypoxia to normoxia. At  
498 day 2 of differentiation, iPSC-derived mesodermal cells were fed with basal medium  
499 supplemented with 4 μM IWR-1 (Merck) for 48 h, to induce cardiac progenitor cell  
500 differentiation. From day 4 onwards, medium was changed every other day with CM  
501 maintenance medium (RPMI 1640, rice-derived recombinant human albumin and L-ascorbic

502 acid 2-phosphate). Contracting CMs appeared at day 8 or 9 of cardiac differentiation. DMD  
503 iPSC-CMs were treated with 3 mM NAC and 0.5  $\mu$ M idebenone from day 8 onwards, and 20  
504  $\mu$ g/mL ataluren (PTC124) was supplemented to the cardiac differentiation medium from day 4  
505 onwards. In *NOX4* knockdown experiments, 250 nM of single-stranded antisense  
506 oligonucleotides for silencing *NOX4* mRNA, called Antisense LNA GapmeRs (Qiagen), were  
507 added to the cell cultures at day 8 of differentiation.

508

### 509 *Generation of 3D EHT Constructs*

510 3D EHT constructs were generated from 8- to 10-day-old iPSC-CMs, as previously described  
511 (30). CMs were dissociated with Collagenase A (1 U/mL; Merck) for 20 minutes at 37°C and  
512 transferred to custom-made 2% agarose (UltraPure; Thermo Fisher Scientific) casting molds in  
513 24-well plate formats. The single-cell suspension was maintained in DMEM low glucose  
514 medium, containing 10% Fetal Bovine Serum (FBS), 1% heat-inactivated Horse Serum (HS),  
515 1% Pen/Strep (all from Thermo Fisher Scientific) and 0.1% Rho-associated protein kinase  
516 (ROCK) inhibitor (Y-27632; VWR). Each EHT construct consisted of  $1.0 \times 10^6$  cells,  
517 supplemented with GFR Matrigel, 5.06% fibrinogen (human plasma; Merck), 3U/mL thrombin  
518 (Stago BNL) and 1.44% aprotinin (Merck). The casting was performed around two flexible  
519 polydimethylsiloxane (PDMS) microposts within the agarose molds. After 2 h of incubation,  
520 polymerization formed a fibrin block around the microposts, embedding the single-cell  
521 suspension. The fibrin block was removed from the casting molds and transferred to 24-well  
522 plates, containing EHT medium composed of DMEM low glucose, 10% heat-inactivated HS,  
523 1% Pen/Strep, 0.1% aprotinin and 0.1% Human Insulin Solution (Merck). Medium was  
524 changed every other day with EHT medium.

525

526

527 *Quantitative Real-Time PCR Analysis*

528 Total RNA was extracted using the PureLink RNA Mini Kit and treated with the TURBO DNA-  
529 Free DNase Kit to assure highly pure RNA. 1 µg RNA was reverse transcribed into cDNA with  
530 SuperScript III Reverse Transcriptase First-Strand Synthesis SuperMix. Quantitative Real-  
531 Time PCR was performed with the Platinum SYBR Green qPCR SuperMix-UDG (all from  
532 Thermo Fisher Scientific). The oligonucleotide primer sequences (all from IDT) are listed in  
533 Table S2. A 10-fold dilution series ranging from  $10^{-3}$  to  $10^{-8}$  of 50 ng/µL human genomic DNA  
534 was used to evaluate the primer efficiency. Delta Ct ( $\Delta$ Ct) values were calculated by subtracting  
535 the Ct values from the genes of interest with the Ct values of the housekeeping genes (*GAPDH*,  
536 *HPRT* and *RPL13a*).

537

538 *Flow Cytometric Analysis*

539 Differentiated iPSC-CMs were dissociated using Collagenase A (1 U/mL) for 20 minutes at  
540 37°C. All flow cytometry procedures were performed according to the manufacturer's  
541 instructions. Hank's Balanced Salt Solution (HBSS; pH 7.2) with CaCl<sub>2</sub> and MgCl<sub>2</sub>  
542 supplemented with 2% FBS (both from Thermo Fisher Scientific), 10 mM HEPES and 10 mM  
543 NaN<sub>3</sub> (both from Merck), was used as staining buffer. For high CM purity, iPSC-CMs were  
544 stained for the surface marker SIRPA (data not shown). If intracellular staining was necessary,  
545 cells were fixed with 4% paraformaldehyde (PFA; Polysciences) for 10 minutes at 37°C and  
546 permeabilized in ice-cold 90% methanol (Merck) for 30 minutes on ice, before the staining  
547 procedure. Fluorescence minus one (FMO) controls and compensations were included for  
548 appropriate gating. Samples were analyzed using the FACS Canto II HTS (BD Biosciences)  
549 and quantified using FlowJo Software Version 10 (FlowJo LLC). Table S3 provides a list of all  
550 flow cytometric antibodies used in this study.

551



552 *Immunofluorescence Imaging*

553 Cells were fixed with 4% PFA for 10 minutes at 4°C, permeabilized for 30 minutes at room  
554 temperature in PBS supplemented with 0.2% Triton X-100 and 1% Bovine Serum Albumin  
555 (BSA) and blocked for 30 minutes at room temperature in 10% donkey serum (all from Merck).  
556 Samples were stained overnight at 4°C with the primary antibodies, followed by the appropriate  
557 secondary antibodies (1 h incubation at room temperature). Immunofluorescent primary and  
558 secondary antibodies were listed in Table S3. Nuclei were counterstained with 10 µg/mL  
559 Hoechst (33342; Thermo Fisher Scientific). Analyses were assessed using the Nikon Eclipse Ti  
560 Microscope or the Nikon Eclipse Ti A1R Configured Confocal Microscope, with appropriate  
561 NIS-Elements Software (all from Nikon).

562

563 *Mitochondria and Cytoplasmic Fractionation*

564 Mitochondrial and cytoplasmic separation was performed using the Mitochondrial Isolation Kit  
565 for Cultured Cells (Thermo Fisher Scientific), according to the manufacturer's instructions with  
566 minor modifications. To obtain a more purified mitochondrial fraction (with a more than 50%  
567 reduction of the lysosomal and peroxisomal contaminants), the post-cell debris supernatant was  
568 subjected to an extra centrifuge step at 3000 x g for 15 minutes. For Western blot analysis,  
569 mitochondrial pellets were lysed with 2% CHAPS (Merck) in Tris-buffered saline (TBS;  
570 containing 25 mM Tris, 0.15 M NaCl; pH 7.2) and subsequently centrifuged at high speed for  
571 2 minutes. Western blot analysis was performed on the supernatant, containing soluble  
572 mitochondrial protein.

573

574 *Western Blot Analysis*

575 Western blot analysis for cell lysates was performed in RIPA buffer supplemented with 10 mM  
576 NaF, 0.5 mM Na<sub>3</sub>VO<sub>4</sub>, 1:100 protease inhibitor cocktail and 1 mM Phenylmethylsulfonyl

577 Fluoride (PMSF; all from Merck). Equal amounts of protein (40  $\mu$ g) were heat-denatured at  
578 95°C in sample-loading buffer (50 mM Tris-HCl, 100 mM DTT, 2% SDS, 0.1% bromophenol  
579 blue and 10% glycerol; pH 6.8), resolved by SDS-polyacrylamide gel electrophoresis and  
580 subsequently transferred to nitrocellulose membranes (Amersham Protran Western Blotting  
581 Membranes; Merck). The filters were blocked with TBS containing 0.05% Tween and 5% non-  
582 fat dry milk (Merck). Incubation was done overnight with the indicated primary antibody  
583 dilutions, as listed in Table S2. Horseradish peroxidase-conjugated secondary antibodies (Bio-  
584 Rad) were diluted 1:5,000 in TBS-Tween (0.05%) with 2.5% non-fat dry milk. After incubation  
585 with SuperSignal Pico or Femto chemiluminescence substrate (both from Thermo Fisher  
586 Scientific), the polypeptide bands were detected with GelDoc Chemiluminescence Detection  
587 System (Bio-Rad). Quantification of relative densitometry was obtained by normalizing to the  
588 background and to loading control proteins (ACTB, from Cell Signaling Technology) using  
589 Image Lab Software (Bio-Rad).

590

### 591 *Patch-Clamp Electrophysiology and Ca<sup>2+</sup> Recordings*

592 Single cells were seeded on Matrigel-coated coverslips. Cells were perfused at 37°C with a  
593 solution containing the following (in mM): 137 NaCl, 5.4 KCl, 1.8 CaCl<sub>2</sub>, 0.5 MgCl<sub>2</sub>, 10  
594 glucose and 10 Na-HEPES. The pH was adjusted to 7.4 with NaOH. The patch-clamp pipettes  
595 were filled with a solution containing the following (in mM): 120 K-Asp, 20 KCl, 10 HEPES,  
596 5 Mg-ATP, 10 NaCl and 0.05 K<sub>5</sub>Fluo-4. The pH was adjusted to 7.2 with KOH. Patch electrode  
597 resistances were between 2.5 and 3 M $\Omega$  when the pipettes were filled with intracellular solution.  
598 Cells were patched in the whole-cell configuration. Data were recorded using an Axopatch  
599 200B amplifier (Axon Instruments) at a sampling rate of 10 kHz. Signals were filtered with 5  
600 kHz low-pass Bessel filters. Action potentials (APs) were recorded in current-clamp mode, and  
601 if not spontaneous, after a 5 ms pulse of 0.5 nA at a 1 Hz frequency. Ca<sup>2+</sup> currents were

602 measured in voltage-clamp mode. After a Na<sup>+</sup> current inactivation step from -70 mV to 40 mV  
603 for 750 ms, Ca<sup>2+</sup> currents were recorded with 10 mV voltage steps from -40 mV to 60 mV  
604 during 205 ms. For analysis, the maximum amplitude of the Ca<sup>2+</sup> current was measured and  
605 corrected for the cell capacitance. Data were analyzed with Clampfit Software (Axon  
606 Instruments).

607

### 608 *Contractility Measurements of 3D EHT Constructs*

609 The contractile properties of 3D EHTs were monitored by measuring the deflection distances  
610 of the microposts of the EHT device (in  $\mu\text{m}$ ) during spontaneous contraction and relaxation  
611 under temperature-controlled conditions (37°C) in oxygenated Tyrode's solution (in mM;  
612 containing 137 NaCl, 5.4 KCl, 0.5 MgCl<sub>2</sub>, 12.8 HEPES and 5.5 Glucose; dissolved in deionized  
613 sterile water at pH 7.4) with Ca<sup>2+</sup>. A Ca<sup>2+</sup> concentration of 1.8 mM was used to mimic  
614 physiological conditions. EHT constructs for contractility measurements were generated from  
615 8-day-old iPSC-CMs and monitored after 5 days of EHT maturation.

616

### 617 *ATP Luminescence and NADPH Detection*

618 The level of ATP was measured using the Luminescent ATP Detection Assay Kit (Abcam),  
619 according to the manufacturer's instructions. Recordings were performed with the EG&G  
620 Berthold Microplate Luminometer LB 96V and corresponding software (Berthold  
621 Technologies). Using the NADPH Assay Kit (Abcam), NADPH-dependent ROS production  
622 was measured in the presence or absence of 2.5 or 5.0 mM ATP (preincubated for 60 minutes)  
623 in the total CM fraction or isolated mitochondrial fraction, according to the manufacturer's  
624 instructions. Recordings were performed with the ELx808 Absorbance Microplate Reader and  
625 quantified using Gen5 Software Version 3 (both from BioTek Instruments).

626

627 *Statistical Analysis*

628 Data were statistically analyzed using Prism Software Version 8 (GraphPad). All data were  
629 reported as mean  $\pm$  standard error of the mean (SEM). Differences between two groups were  
630 examined for statistical significance using Student's t-test. One-Way or Two-Way ANOVA  
631 (with multiple comparisons test and Tukey's or Bonferroni's correction) were used for three or  
632 more groups. Significance of the difference was indicated as follows: \*P < 0.05; \*\*P < 0.01;  
633 \*\*\*P < 0.001 and \*\*\*\*P < 0.0001.

634 **REFERENCES**

- 635 1. T. S. Li, M. Takahashi, R. Suzuki, T. Kobayashi, H. Ito, A. Mikamo, K. Hamano,  
636 Pravastatin improves remodeling and cardiac function after myocardial infarction by an  
637 antiinflammatory mechanism rather than by the induction of angiogenesis. *Ann Thorac*  
638 *Surg* **81**, 2217-2225 (2006).
- 639 2. C. L. Mummery, J. Zhang, E. S. Ng, D. A. Elliott, A. G. Elefanty, T. J. Kamp,  
640 Differentiation of human embryonic stem cells and induced pluripotent stem cells to  
641 cardiomyocytes: a methods overview. *Circ Res* **111**, 344-358 (2012).
- 642 3. E. Mercuri, C. G. Bonnemann, F. Muntoni, Muscular dystrophies. *Lancet* **394**, 2025-  
643 2038 (2019).
- 644 4. A. E. Emery, The muscular dystrophies. *Lancet* **359**, 687-695 (2002).
- 645 5. E. Landfeldt, R. Thompson, T. Sejersen, H. J. McMillan, J. Kirschner, H. Lochmuller,  
646 Life expectancy at birth in Duchenne muscular dystrophy: a systematic review and  
647 meta-analysis. *Eur J Epidemiol* **35**, 643-653 (2020).
- 648 6. K. E. Davies, K. J. Nowak, Molecular mechanisms of muscular dystrophies: old and  
649 new players. *Nat Rev Mol Cell Biol* **7**, 762-773 (2006).
- 650 7. D. G. Allen, N. P. Whitehead, S. C. Froehner, Absence of Dystrophin Disrupts Skeletal  
651 Muscle Signaling: Roles of Ca<sup>2+</sup>, Reactive Oxygen Species, and Nitric Oxide in the  
652 Development of Muscular Dystrophy. *Physiol Rev* **96**, 253-305 (2016).
- 653 8. H. D. Sesso, J. E. Buring, W. G. Christen, T. Kurth, C. Belanger, J. MacFadyen, V.  
654 Bubes, J. E. Manson, R. J. Glynn, J. M. Gaziano, Vitamins E and C in the prevention of  
655 cardiovascular disease in men: the Physicians' Health Study II randomized controlled  
656 trial. *JAMA* **300**, 2123-2133 (2008).

- 657 9. I. Heart Outcomes Prevention Evaluation Study, S. Yusuf, G. Dagenais, J. Pogue, J.  
658 Bosch, P. Sleight, Vitamin E supplementation and cardiovascular events in high-risk  
659 patients. *N Engl J Med* **342**, 154-160 (2000).
- 660 10. K. Bedard, K. H. Krause, The NOX family of ROS-generating NADPH oxidases:  
661 physiology and pathophysiology. *Physiol Rev* **87**, 245-313 (2007).
- 662 11. A. Vermot, I. Petit-Hartlein, S. M. E. Smith, F. Fieschi, NADPH Oxidases (NOX): An  
663 Overview from Discovery, Molecular Mechanisms to Physiology and Pathology.  
664 *Antioxidants (Basel)* **10**, (2021).
- 665 12. T. Ago, J. Kuroda, J. Pain, C. Fu, H. Li, J. Sadoshima, Upregulation of Nox4 by  
666 hypertrophic stimuli promotes apoptosis and mitochondrial dysfunction in cardiac  
667 myocytes. *Circ Res* **106**, 1253-1264 (2010).
- 668 13. J. Kuroda, T. Ago, S. Matsushima, P. Zhai, M. D. Schneider, J. Sadoshima, NADPH  
669 oxidase 4 (Nox4) is a major source of oxidative stress in the failing heart. *Proc Natl*  
670 *Acad Sci U S A* **107**, 15565-15570 (2010).
- 671 14. C. F. Spurney, S. Knoblach, E. E. Pistilli, K. Nagaraju, G. R. Martin, E. P. Hoffman,  
672 Dystrophin-deficient cardiomyopathy in mouse: expression of Nox4 and Lox are  
673 associated with fibrosis and altered functional parameters in the heart. *Neuromuscul*  
674 *Disord* **18**, 371-381 (2008).
- 675 15. Z. V. Varga, M. Pipicz, J. A. Baan, T. Baranyai, G. Koncsos, P. Leszek, M.  
676 Kusmierczyk, F. Sanchez-Cabo, P. Garcia-Pavia, G. J. Brenner, Z. Giricz, T. Csont, L.  
677 Mendler, E. Lara-Pezzi, P. Pacher, P. Ferdinandy, Alternative Splicing of NOX4 in the  
678 Failing Human Heart. *Front Physiol* **8**, 935 (2017).
- 679 16. M. Zhang, A. Perino, A. Ghigo, E. Hirsch, A. M. Shah, NADPH oxidases in heart  
680 failure: poachers or gamekeepers? *Antioxid Redox Signal* **18**, 1024-1041 (2013).

- 681 17. K. D. Martyn, L. M. Frederick, K. von Loehneysen, M. C. Dinauer, U. G. Knaus,  
682 Functional analysis of Nox4 reveals unique characteristics compared to other NADPH  
683 oxidases. *Cell Signal* **18**, 69-82 (2006).
- 684 18. M. Zhang, A. C. Brewer, K. Schroder, C. X. Santos, D. J. Grieve, M. Wang, N.  
685 Anilkumar, B. Yu, X. Dong, S. J. Walker, R. P. Brandes, A. M. Shah, NADPH oxidase-  
686 4 mediates protection against chronic load-induced stress in mouse hearts by enhancing  
687 angiogenesis. *Proc Natl Acad Sci U S A* **107**, 18121-18126 (2010).
- 688 19. R. J. Khairallah, G. Shi, F. Sbrana, B. L. Prosser, C. Borroto, M. J. Mazaitis, E. P.  
689 Hoffman, A. Mahurkar, F. Sachs, Y. Sun, Y. W. Chen, R. Raiteri, W. J. Lederer, S. G.  
690 Dorsey, C. W. Ward, Microtubules underlie dysfunction in duchenne muscular  
691 dystrophy. *Sci Signal* **5**, ra56 (2012).
- 692 20. B. Wu, H. M. Moulton, P. L. Iversen, J. Jiang, J. Li, J. Li, C. F. Spurney, A. Sali, A. D.  
693 Guerron, K. Nagaraju, T. Doran, P. Lu, X. Xiao, Q. L. Lu, Effective rescue of dystrophin  
694 improves cardiac function in dystrophin-deficient mice by a modified morpholino  
695 oligomer. *Proc Natl Acad Sci U S A* **105**, 14814-14819 (2008).
- 696 21. E. M. Welch, E. R. Barton, J. Zhuo, Y. Tomizawa, W. J. Friesen, P. Trifillis, S.  
697 Paushkin, M. Patel, C. R. Trotta, S. Hwang, R. G. Wilde, G. Karp, J. Takasugi, G. Chen,  
698 S. Jones, H. Ren, Y. C. Moon, D. Corson, A. A. Turpoff, J. A. Campbell, M. M. Conn,  
699 A. Khan, N. G. Almstead, J. Hedrick, A. Mollin, N. Risher, M. Weetall, S. Yeh, A. A.  
700 Branstrom, J. M. Colacino, J. Babiak, W. D. Ju, S. Hirawat, V. J. Northcutt, L. L. Miller,  
701 P. Spatrack, F. He, M. Kawana, H. Feng, A. Jacobson, S. W. Peltz, H. L. Sweeney,  
702 PTC124 targets genetic disorders caused by nonsense mutations. *Nature* **447**, 87-91  
703 (2007).
- 704 22. A. Moretti, L. Fonteyne, F. Giesert, P. Hoppmann, A. B. Meier, T. Bozoglu, A. Baehr,  
705 C. M. Schneider, D. Sinnecker, K. Klett, T. Frohlich, F. A. Rahman, T. Haufe, S. Sun,

- 706 V. Jurisch, B. Kessler, R. Hinkel, R. Dirschinger, E. Martens, C. Jilek, A. Graf, S. Krebs,  
707 G. Santamaria, M. Kurome, V. Zakhartchenko, B. Campbell, K. Voelse, A. Wolf, T.  
708 Ziegler, S. Reichert, S. Lee, F. Flenkenthaler, T. Dorn, I. Jeremias, H. Blum, A.  
709 Dendorfer, A. Schnieke, S. Krause, M. C. Walter, N. Klymiuk, K. L. Laugwitz, E. Wolf,  
710 W. Wurst, C. Kupatt, Somatic gene editing ameliorates skeletal and cardiac muscle  
711 failure in pig and human models of Duchenne muscular dystrophy. *Nat Med* **26**, 207-  
712 214 (2020).
- 713 23. A. Bajek, D. Porowinska, T. Kloskowski, E. Brzoska, M. A. Ciemerych, T. Drewa, Cell  
714 therapy in Duchenne muscular dystrophy treatment: clinical trials overview. *Crit Rev*  
715 *Eukaryot Gene Expr* **25**, 1-11 (2015).
- 716 24. M. P. Calos, The CRISPR Way to Think about Duchenne's. *N Engl J Med* **374**, 1684-  
717 1686 (2016).
- 718 25. C. S. Young, M. R. Hicks, N. V. Ermolova, H. Nakano, M. Jan, S. Younesi, S.  
719 Karumbayaram, C. Kumagai-Cresse, D. Wang, J. A. Zack, D. B. Kohn, A. Nakano, S.  
720 F. Nelson, M. C. Miceli, M. J. Spencer, A. D. Pyle, A Single CRISPR-Cas9 Deletion  
721 Strategy that Targets the Majority of DMD Patients Restores Dystrophin Function in  
722 hiPSC-Derived Muscle Cells. *Cell Stem Cell* **18**, 533-540 (2016).
- 723 26. I. E. C. Verhaart, A. Aartsma-Rus, Therapeutic developments for Duchenne muscular  
724 dystrophy. *Nat Rev Neurol* **15**, 373-386 (2019).
- 725 27. G. M. Buyse, N. Goemans, M. van den Hauwe, D. Thijs, I. J. de Groot, U. Schara, B.  
726 Ceulemans, T. Meier, L. Mertens, Idebenone as a novel, therapeutic approach for  
727 Duchenne muscular dystrophy: results from a 12 month, double-blind, randomized  
728 placebo-controlled trial. *Neuromuscul Disord* **21**, 396-405 (2011).
- 729 28. G. M. Buyse, T. Voit, U. Schara, C. S. M. Straathof, M. G. D'Angelo, G. Bernert, J. M.  
730 Cuisset, R. S. Finkel, N. Goemans, C. M. McDonald, C. Rummey, T. Meier, D. S.



- 731 Group, Efficacy of idebenone on respiratory function in patients with Duchenne  
732 muscular dystrophy not using glucocorticoids (DELOS): a double-blind randomised  
733 placebo-controlled phase 3 trial. *Lancet* **385**, 1748-1757 (2015).
- 734 29. P. W. Burridge, E. Matsa, P. Shukla, Z. C. Lin, J. M. Churko, A. D. Ebert, F. Lan, S.  
735 Diecke, B. Huber, N. M. Mordwinkin, J. R. Plews, O. J. Abilez, B. Cui, J. D. Gold, J.  
736 C. Wu, Chemically defined generation of human cardiomyocytes. *Nat Methods* **11**, 855-  
737 860 (2014).
- 738 30. K. Breckwoldt, D. Letuffe-Breniere, I. Mannhardt, T. Schulze, B. Ulmer, T. Werner, A.  
739 Benzin, B. Klampe, M. C. Reinsch, S. Laufer, A. Shibamiya, M. Prondzynski, G.  
740 Mearini, D. Schade, S. Fuchs, C. Neuber, E. Kramer, U. Saleem, M. L. Schulze, M. L.  
741 Rodriguez, T. Eschenhagen, A. Hansen, Differentiation of cardiomyocytes and  
742 generation of human engineered heart tissue. *Nat Protoc* **12**, 1177-1197 (2017).
- 743 31. B. Eisen, R. Ben Jehuda, A. J. Cuttitta, L. N. Mekies, Y. Shemer, P. Baskin, I. Reiter,  
744 L. Willi, D. Freimark, M. Gherghiceanu, L. Monserrat, M. Scherr, D. Hilfiker-Kleiner,  
745 M. Arad, D. E. Michele, O. Binah, Electrophysiological abnormalities in induced  
746 pluripotent stem cell-derived cardiomyocytes generated from Duchenne muscular  
747 dystrophy patients. *J Cell Mol Med* **23**, 2125-2135 (2019).
- 748 32. B. Lin, Y. Li, L. Han, A. D. Kaplan, Y. Ao, S. Kalra, G. C. Bett, R. L. Rasmusson, C.  
749 Denning, L. Yang, Modeling and study of the mechanism of dilated cardiomyopathy  
750 using induced pluripotent stem cells derived from individuals with Duchenne muscular  
751 dystrophy. *Dis Model Mech* **8**, 457-466 (2015).
- 752 33. X. Guan, D. L. Mack, C. M. Moreno, J. L. Strande, J. Mathieu, Y. Shi, C. D. Markert,  
753 Z. Wang, G. Liu, M. W. Lawlor, E. C. Moorefield, T. N. Jones, J. A. Fugate, M. E.  
754 Furth, C. E. Murry, H. Ruohola-Baker, Y. Zhang, L. F. Santana, M. K. Childers,

- 755           Dystrophin-deficient cardiomyocytes derived from human urine: new biologic reagents  
756           for drug discovery. *Stem Cell Res* **12**, 467-480 (2014).
- 757 34.    F. Tsurumi, S. Baba, D. Yoshinaga, K. Umeda, T. Hirata, J. Takita, T. Heike, The  
758           intracellular Ca<sup>2+</sup> concentration is elevated in cardiomyocytes differentiated from  
759           hiPSCs derived from a Duchenne muscular dystrophy patient. *PLoS One* **14**, e0213768  
760           (2019).
- 761 35.    M. Sato, N. Shiba, D. Miyazaki, Y. Shiba, Y. Echigoya, T. Yokota, H. Takizawa, Y.  
762           Aoki, S. Takeda, A. Nakamura, Amelioration of intracellular Ca(2+) regulation by  
763           exon-45 skipping in Duchenne muscular dystrophy-induced pluripotent stem cell-  
764           derived cardiomyocytes. *Biochem Biophys Res Commun* **520**, 179-185 (2019).
- 765 36.    J. M. Pioner, X. Guan, J. M. Klaiman, A. W. Racca, L. Pabon, V. Muskheli, J.  
766           Macadangang, C. Ferrantini, M. R. Hoopmann, R. L. Moritz, D. H. Kim, C. Tesi, C.  
767           Poggesi, C. E. Murry, M. K. Childers, D. L. Mack, M. Regnier, Absence of full-length  
768           dystrophin impairs normal maturation and contraction of cardiomyocytes derived from  
769           human-induced pluripotent stem cells. *Cardiovasc Res* **116**, 368-382 (2020).
- 770 37.    C. Jung, A. S. Martins, E. Niggli, N. Shirokova, Dystrophic cardiomyopathy:  
771           amplification of cellular damage by Ca<sup>2+</sup> signalling and reactive oxygen species-  
772           generating pathways. *Cardiovasc Res* **77**, 766-773 (2008).
- 773 38.    C. A. Timpani, A. Hayes, E. Rybalka, Revisiting the dystrophin-ATP connection: How  
774           half a century of research still implicates mitochondrial dysfunction in Duchenne  
775           Muscular Dystrophy aetiology. *Med Hypotheses* **85**, 1021-1033 (2015).
- 776 39.    L. D. Zorova, V. A. Popkov, E. Y. Plotnikov, D. N. Silachev, I. B. Pevzner, S. S.  
777           Jankauskas, V. A. Babenko, S. D. Zorov, A. V. Balakireva, M. Juhaszova, S. J. Sollott,  
778           D. B. Zorov, Mitochondrial membrane potential. *Anal Biochem* **552**, 50-59 (2018).

- 779 40. A. Mathur, Y. Hong, B. K. Kemp, A. A. Barrientos, J. D. Erusalimsky, Evaluation of  
780 fluorescent dyes for the detection of mitochondrial membrane potential changes in  
781 cultured cardiomyocytes. *Cardiovasc Res* **46**, 126-138 (2000).
- 782 41. C. A. Belmokhtar, J. Hillion, E. Segal-Bendirdjian, Staurosporine induces apoptosis  
783 through both caspase-dependent and caspase-independent mechanisms. *Oncogene* **20**,  
784 3354-3362 (2001).
- 785 42. K. Block, Y. Gorin, H. E. Abboud, Subcellular localization of Nox4 and regulation in  
786 diabetes. *Proc Natl Acad Sci U S A* **106**, 14385-14390 (2009).
- 787 43. K. Shanmugasundaram, B. K. Nayak, W. E. Friedrichs, D. Kaushik, R. Rodriguez, K.  
788 Block, NOX4 functions as a mitochondrial energetic sensor coupling cancer metabolic  
789 reprogramming to drug resistance. *Nat Commun* **8**, 997 (2017).
- 790 44. V. Kyrychenko, S. Kyrychenko, M. Tiburcy, J. M. Shelton, C. Long, J. W. Schneider,  
791 W. H. Zimmermann, R. Bassel-Duby, E. N. Olson, Functional correction of dystrophin  
792 actin binding domain mutations by genome editing. *JCI Insight* **2**, (2017).
- 793 45. C. Long, H. Li, M. Tiburcy, C. Rodriguez-Caycedo, V. Kyrychenko, H. Zhou, Y.  
794 Zhang, Y. L. Min, J. M. Shelton, P. P. A. Mammen, N. Y. Liaw, W. H. Zimmermann,  
795 R. Bassel-Duby, J. W. Schneider, E. N. Olson, Correction of diverse muscular dystrophy  
796 mutations in human engineered heart muscle by single-site genome editing. *Sci Adv* **4**,  
797 eaap9004 (2018).
- 798 46. N. Cao, Z. Liu, Z. Chen, J. Wang, T. Chen, X. Zhao, Y. Ma, L. Qin, J. Kang, B. Wei,  
799 L. Wang, Y. Jin, H. T. Yang, Ascorbic acid enhances the cardiac differentiation of  
800 induced pluripotent stem cells through promoting the proliferation of cardiac progenitor  
801 cells. *Cell Res* **22**, 219-236 (2012).
- 802 47. H. Fukumura, M. Sato, K. Kezuka, I. Sato, X. Feng, S. Okumura, T. Fujita, U.  
803 Yokoyama, H. Eguchi, Y. Ishikawa, T. Saito, Effect of ascorbic acid on reactive oxygen

- 804 species production in chemotherapy and hyperthermia in prostate cancer cells. *J Physiol*  
805 *Sci* **62**, 251-257 (2012).
- 806 48. X. Wei, Y. Xu, F. F. Xu, L. Chaiswing, D. Schnell, T. Noel, C. Wang, J. Chen, D. K. St  
807 Clair, W. H. St Clair, RelB Expression Determines the Differential Effects of Ascorbic  
808 Acid in Normal and Cancer Cells. *Cancer Res* **77**, 1345-1356 (2017).
- 809 49. C. Bartsch, M. M. Bekhite, A. Wolheim, M. Richter, C. Ruhe, B. Wissuwa, A.  
810 Marciniak, J. Muller, R. Heller, H. R. Figulla, H. Sauer, M. Wartenberg, NADPH  
811 oxidase and eNOS control cardiomyogenesis in mouse embryonic stem cells on ascorbic  
812 acid treatment. *Free Radic Biol Med* **51**, 432-443 (2011).
- 813 50. H. Yasutake, J. K. Lee, A. Hashimoto, K. Masuyama, J. Li, Y. Kuramoto, S. Higo, S.  
814 Hikoso, K. Hidaka, A. T. Naito, S. Miyagawa, Y. Sawa, I. Komuro, Y. Sakata,  
815 Decreased YAP activity reduces proliferative ability in human induced pluripotent stem  
816 cell of duchenne muscular dystrophy derived cardiomyocytes. *Sci Rep* **11**, 10351  
817 (2021).
- 818 51. B. L. Prosser, C. W. Ward, W. J. Lederer, X-ROS signaling: rapid mechano-chemo  
819 transduction in heart. *Science* **333**, 1440-1445 (2011).
- 820 52. J. P. Kerr, P. Robison, G. Shi, A. I. Bogush, A. M. Kempema, J. K. Hexum, N. Becerra,  
821 D. A. Harki, S. S. Martin, R. Raiteri, B. L. Prosser, C. W. Ward, Detyrosinated  
822 microtubules modulate mechanotransduction in heart and skeletal muscle. *Nat Commun*  
823 **6**, 8526 (2015).
- 824 53. C. Campbell, R. J. Barohn, E. Bertini, B. Chabrol, G. P. Comi, B. T. Darras, R. S. Finkel,  
825 K. M. Flanigan, N. Goemans, S. T. Iannaccone, K. J. Jones, J. Kirschner, J. K. Mah, K.  
826 D. Mathews, C. M. McDonald, E. Mercuri, Y. Nevo, Y. Pereon, J. B. Renfroe, M. M.  
827 Ryan, J. B. Sampson, U. Schara, T. Sejersen, K. Selby, M. Tulinius, J. J. Vilchez, T.  
828 Voit, L. J. Wei, B. L. Wong, G. Elfring, M. Souza, J. McIntosh, P. Trifillis, S. W. Peltz,

- 829 F. Muntoni, P. G.-D. S. Group, A. D. S. Group, G. Clinical Evaluator Training, Meta-  
830 analyses of ataluren randomized controlled trials in nonsense mutation Duchenne  
831 muscular dystrophy. *J Comp Eff Res*, (2020).
- 832 54. J. E. Walker, M. Saraste, M. J. Runswick, N. J. Gay, Distantly related sequences in the  
833 alpha- and beta-subunits of ATP synthase, myosin, kinases and other ATP-requiring  
834 enzymes and a common nucleotide binding fold. *EMBO J* **1**, 945-951 (1982).
- 835 55. F. Moussavi-Harami, M. V. Razumova, A. W. Racca, Y. Cheng, A. Stempien-Otero,  
836 M. Regnier, 2-Deoxy adenosine triphosphate improves contraction in human end-stage  
837 heart failure. *J Mol Cell Cardiol* **79**, 256-263 (2015).
- 838 56. S. C. Kolwicz, Jr., G. L. Odom, S. G. Nowakowski, F. Moussavi-Harami, X. Chen, H.  
839 Reinecke, S. D. Hauschka, C. E. Murry, G. G. Mahairas, M. Regnier, AAV6-mediated  
840 Cardiac-specific Overexpression of Ribonucleotide Reductase Enhances Myocardial  
841 Contractility. *Mol Ther* **24**, 240-250 (2016).
- 842 57. S. Kadota, J. Carey, H. Reinecke, J. Leggett, S. Teichman, M. A. Laflamme, C. E.  
843 Murry, M. Regnier, G. G. Mahairas, Ribonucleotide reductase-mediated increase in  
844 dATP improves cardiac performance via myosin activation in a large animal model of  
845 heart failure. *Eur J Heart Fail* **17**, 772-781 (2015).
- 846 58. A. Atmanli, A. C. Chai, M. Cui, Z. Wang, T. Nishiyama, R. Bassel-Duby, E. N. Olson,  
847 Cardiac Myoediting Attenuates Cardiac Abnormalities in Human and Mouse Models of  
848 Duchenne Muscular Dystrophy. *Circ Res*, (2021).
- 849 59. F. A. Ran, P. D. Hsu, J. Wright, V. Agarwala, D. A. Scott, F. Zhang, Genome  
850 engineering using the CRISPR-Cas9 system. *Nat Protoc* **8**, 2281-2308 (2013).
- 851 60. A. M. Patel, K. Wierda, L. Thorrez, M. van Putten, J. De Smedt, L. Ribeiro, T. Tricot,  
852 M. Gajjar, R. Duellen, P. Van Damme, L. De Waele, N. Goemans, C. Tanganyika-de  
853 Winter, D. Costamagna, A. Aartsma-Rus, H. van Duyvenvoorde, M. Sampaolesi, G. M.

- 854 Buyse, C. M. Verfaillie, Dystrophin deficiency leads to dysfunctional glutamate  
855 clearance in iPSC derived astrocytes. *Transl Psychiatry* **9**, 200 (2019).
- 856 61. M. Coll, L. Perea, R. Boon, S. B. Leite, J. Vallverdu, I. Mannaerts, A. Smout, A. El  
857 Taghdouini, D. Blaya, D. Rodrigo-Torres, I. Graupera, B. Aguilar-Bravo, C. Chesne,  
858 M. Najimi, E. Sokal, J. J. Lozano, L. A. van Grunsven, C. M. Verfaillie, P. Sancho-Bru,  
859 Generation of Hepatic Stellate Cells from Human Pluripotent Stem Cells Enables In  
860 Vitro Modeling of Liver Fibrosis. *Cell Stem Cell* **23**, 101-113 e107 (2018).
- 861 62. C. Rauch, E. Feifel, G. Kern, C. Murphy, F. Meier, W. Parson, M. Beilmann, P.  
862 Jennings, G. Gstraunthaler, A. Wilmes, Differentiation of human iPSCs into functional  
863 podocytes. *PLoS One* **13**, e0203869 (2018).

864 **ACKNOWLEDGEMENTS**

865 The authors thank Santhera Pharmaceuticals (Pratteln, Switzerland) for providing idebenone.  
866 The authors gratefully acknowledge Hanne Grosemans and Sylvia Sauvage for technical  
867 assistance; Ewa Berlińska, Filippo Conti, Vittoria Marini and Ilaria Tortorella for the assistance  
868 during their internship period at the KU Leuven; and Christina Vochten and Vicky Raets for  
869 the administrative assistance. **Funding:** R.D. is supported by KU Leuven Rondoufonds voor  
870 Duchenne Onderzoek (EQQ-FODUCH-O2010), FWO (#G066821N) and the internal KU  
871 Leuven grant (C24/18/103). This work has been supported with the contribution of “Opening  
872 The Future” Campaign (EJJ-OPTFUT-02010), CARIPLO 2015\_0634, FWO (#G0D4517N),  
873 GOA (EJJ-C2161-GOA/11/012), IUAP-VII/07 (EJJ-C4851-17/07-P), OT#09-053 (EJJ-  
874 C0420-OT/09/053) and KU Leuven C1-3DMuSyC (C14/17/111) grants. G.M.B. is Senior  
875 Clinical Investigator of the Research Foundation Flanders (FWO Vlaanderen, Belgium).  
876 **Author contributions:** R.D. participated in conception and design, collection and assembly of  
877 data, data analysis and interpretation, and manuscript writing. D.C. participated in western blot  
878 collection and assembly of data, data analysis and interpretation, and reviewed the manuscript.  
879 G.G. participated in patch-clamp electrophysiology and Ca<sup>2+</sup> recordings, data analysis and  
880 interpretation, and reviewed the manuscript. L.D.W. provided DMD patient study samples,  
881 participated in conception and design, data analysis and interpretation, and reviewed the  
882 manuscript. N.G. provided DMD patient study samples, and reviewed the manuscript. K.D.  
883 participated in data analysis and interpretation, and reviewed the manuscript. C.M.V.  
884 participated in conception and design, data analysis and interpretation, and reviewed the  
885 manuscript. K.R.S. participated in conception and design, data analysis and interpretation, and  
886 reviewed the manuscript. G.M.B. and M.S. participated in conception and design, data analysis  
887 and interpretation, reviewed the manuscript, and gave final approval for manuscript submission.  
888 **Competing interests:** G.M.B. was Investigator for clinical trials in DMD sponsored by

889 Santhera Pharmaceuticals. G.M.B. is co-inventor of relevant patent applications. The  
890 investigators and authors had sole discretion over study design, collection, analysis and  
891 interpretation of data, writing of the report and decision to submit the manuscript for  
892 publication. All the other authors declare no competing interests. **Data and materials**  
893 **availability:** All data generated or analyzed during this study are included in this published  
894 article (and its supplementary information files).



895 **LIST OF FIGURES AND SUPPLEMENTARY MATERIALS**

896 **Fig. 1.** DMD iPSC CRISPR/Cas9 gene editing of a nonsense mutation in exon 35 (c.4,996C >  
897 T; p.Arg1,666X) of the Dystrophin gene.

898 **Fig. 2.** Characterization of the iPSC-CM differentiation protocol.

899 **Fig. 3.** Characterization of the cardiomyopathic phenotype *in vitro* of DMD iPSC-CMs,  
900 showing premature cell death, depolarized mitochondria and increased intracellular ROS levels,  
901 which were counteracted by NAC, ataluren (PTC124) and idebenone.

902 **Fig. 4.** Increased expression levels of the ROS-producing NOX family enzyme NOX4 and its  
903 accessory regulatory subunit p22<sup>phox</sup> in Dystrophin-Deficient iPSC-CM cultures.

904 **Fig. 5.** Idebenone could counteract the oxidative stress in DMD iPSC-CMs through ATP  
905 stimulation of the mitochondrial ETC, which, on its turn, reduced ROS-producing NOX4  
906 activity.

907 **Fig. 6.** Improved contraction of 3D EHT constructs after administration of idebenone alone or  
908 idebenone in combination with PTC124 under physiological Ca<sup>2+</sup> levels.

909 **Supplementary Materials:**

910 **Table S1.** Characteristics of DMD subjects and iPSC lines.

911 **Table S2.** List of primers for Quantitative Real-Time PCR.

912 **Table S3.** List of antibodies for flow cytometry (FC), immunostaining (IF) and western blot  
913 (WB).

914 **Fig. S1.** Characterization of the DMD patient hF-iPSC clones, harboring the nonsense mutation  
915 in exon 35 (c.4,996C > T; p.Arg1,666X) of the *Dystrophin* gene, generated by the non-  
916 integrating SeV-mediated reprogramming method.

917 **Fig. S2.** Characterization of the pluripotency state of the CRISPR/Cas9 corrected DMD  
918 isogenic control line.

919 **Fig. S3.** Validation of the Cas9 cutting efficiency and analysis of the off-targets.

920 **Fig. S4.** Lack of Dystrophin protein in iPSC-CMs from DMD patients resulted in premature  
921 cell death.

922 **Fig. S5.** Dystrophin re-expression in DMD iPSC-CMs after PTC124 treatment.

923 **Fig. S6.** Corresponding flow cytometric graphs and quantification for the characterization of  
924 the cardiomyopathic phenotype of DMD iPSC-CMs, showing premature cell death, depolarized  
925 mitochondria and increased intracellular ROS levels.

926 **Fig. S7.** Drug specificity on cell death and intracellular ROS concentrations in the experimental  
927 iPSC-CM groups.

928 **Fig. S8.** Drug specificity on  $\Delta\Psi_m$  and mitochondrial superoxide concentrations in the  
929 experimental iPSC-CM groups.

930 **Fig. S9.** The specificity of the treatment options on the expression levels of NOX4 in iPSC-CM  
931 cultures.

932 **Fig. S10.** NOX4 protein expression levels after STS-induced cell death in DMD and control  
933 iPSC-CMs.

934 **Fig. S11.** Characterization of DMD patient-specific iPSC-CMs *in vitro*, showing increased  
935 NOX4 gene and protein expression levels, depolarized mitochondria and increased intracellular  
936 ROS levels.

937 **Fig. S12.** NADPH-dependent ROS production and intracellular ATP levels in DMD iPSC-CMs  
938 after idebenone application.

939 **Fig. S13.** The specificity of idebenone on the NADPH-dependent ROS production and ATP  
940 levels in the experimental iPSC-CM groups.

941 **FIGURES AND FIGURE LEGENDS**

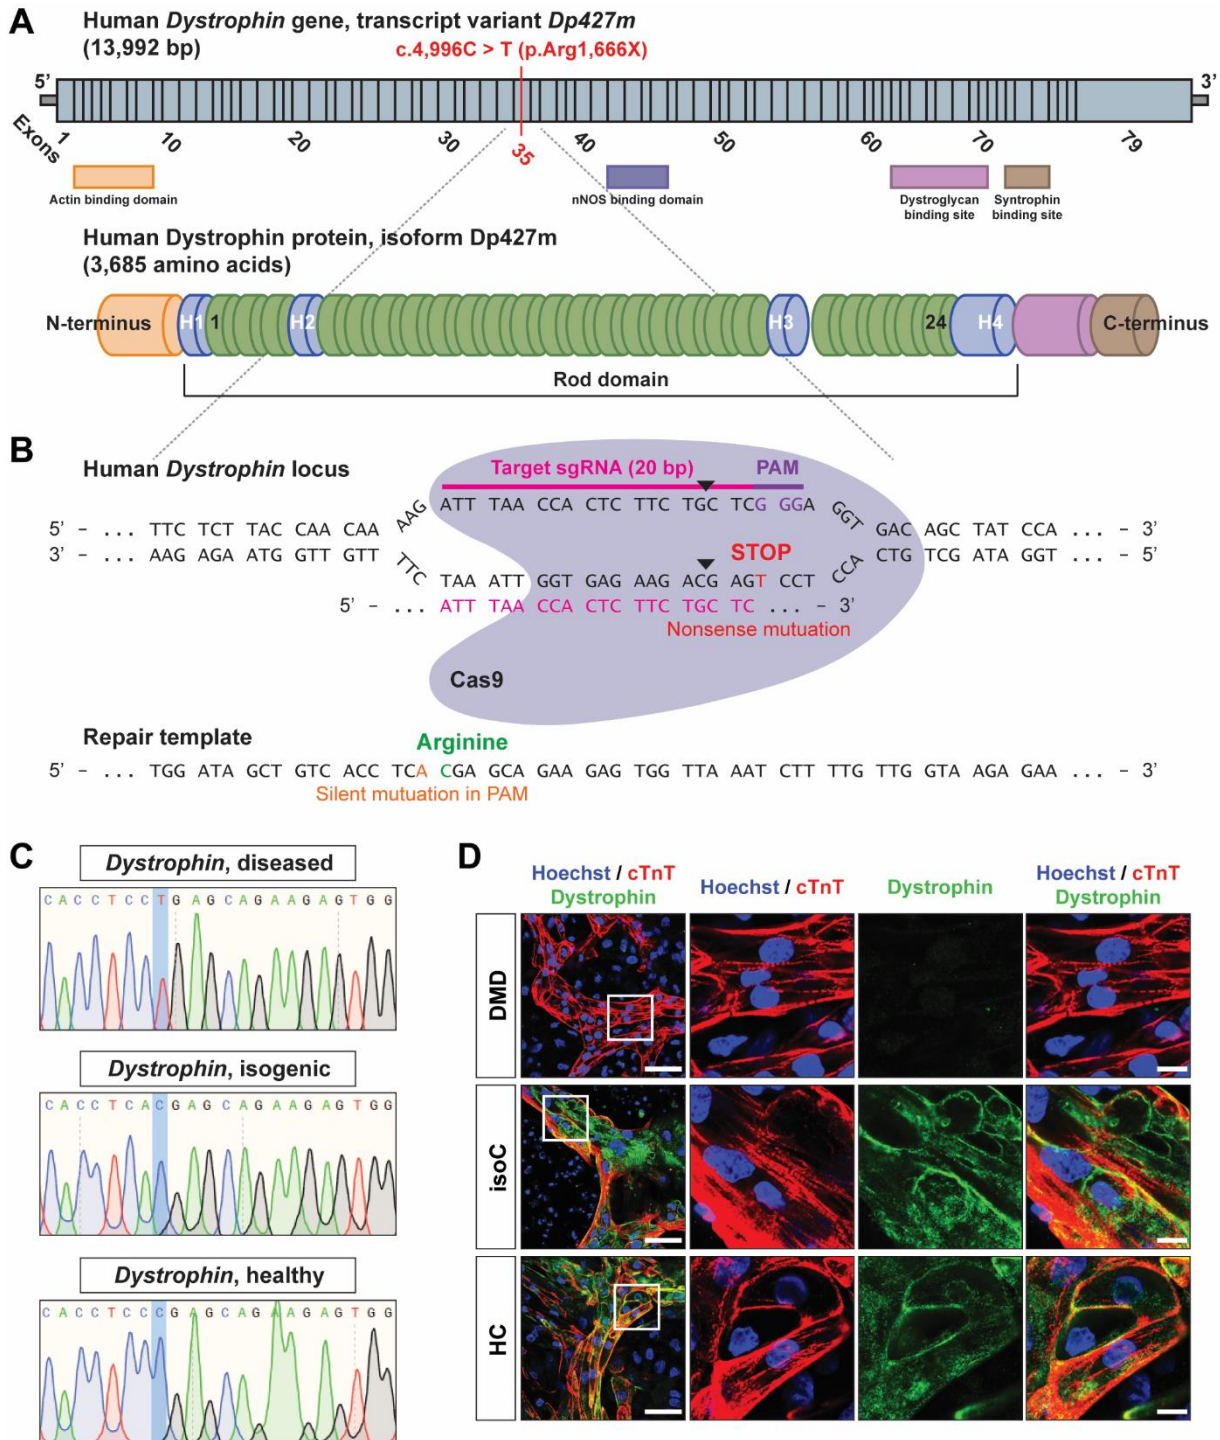

942

943 **Fig. 1: DMD iPSC CRISPR/Cas9 gene editing of a nonsense mutation in exon 35 (c.4,996C**

944 **> T; p.Arg1,666X) of the *Dystrophin* gene. (A) Schematic representation of the human**

945 *Dystrophin* gene sequence (top, transcript variant *Dp427m*) and the encoded Dystrophin protein

946 (bottom, isoform *Dp427m*). The genetic point mutation is located in exon 35 of the *Dystrophin*

947 gene, resulting in a premature stop codon. **(B)** The 20-nucleotide sgRNA  
948 (ATTTAACCACTCTTCTGCTC) to induce the Cas9-mediated DSB (indicated as black  
949 triangles). The donor repair template, containing the CRISPR/Cas9-mediated genetic correction  
950 of the nonsense mutation in the *Dystrophin* gene. **(C)** DNA sequencing of the mutated region  
951 of interest of the *Dystrophin* gene before (DMD diseased) and after (DMD isogenic)  
952 CRISPR/Cas9 gene editing. **(D)** Immunofluorescent staining showing the expression of  
953 Dystrophin protein levels (green) in differentiated DMD iPSC-CMs (cTnT, red and Hoechst,  
954 blue) after CRISPR/Cas9-mediated genetic correction. Scale bar: 50  $\mu\text{m}$ . White boxes with  
955 corresponding insets at higher magnification. Scale bar: 10  $\mu\text{m}$ .

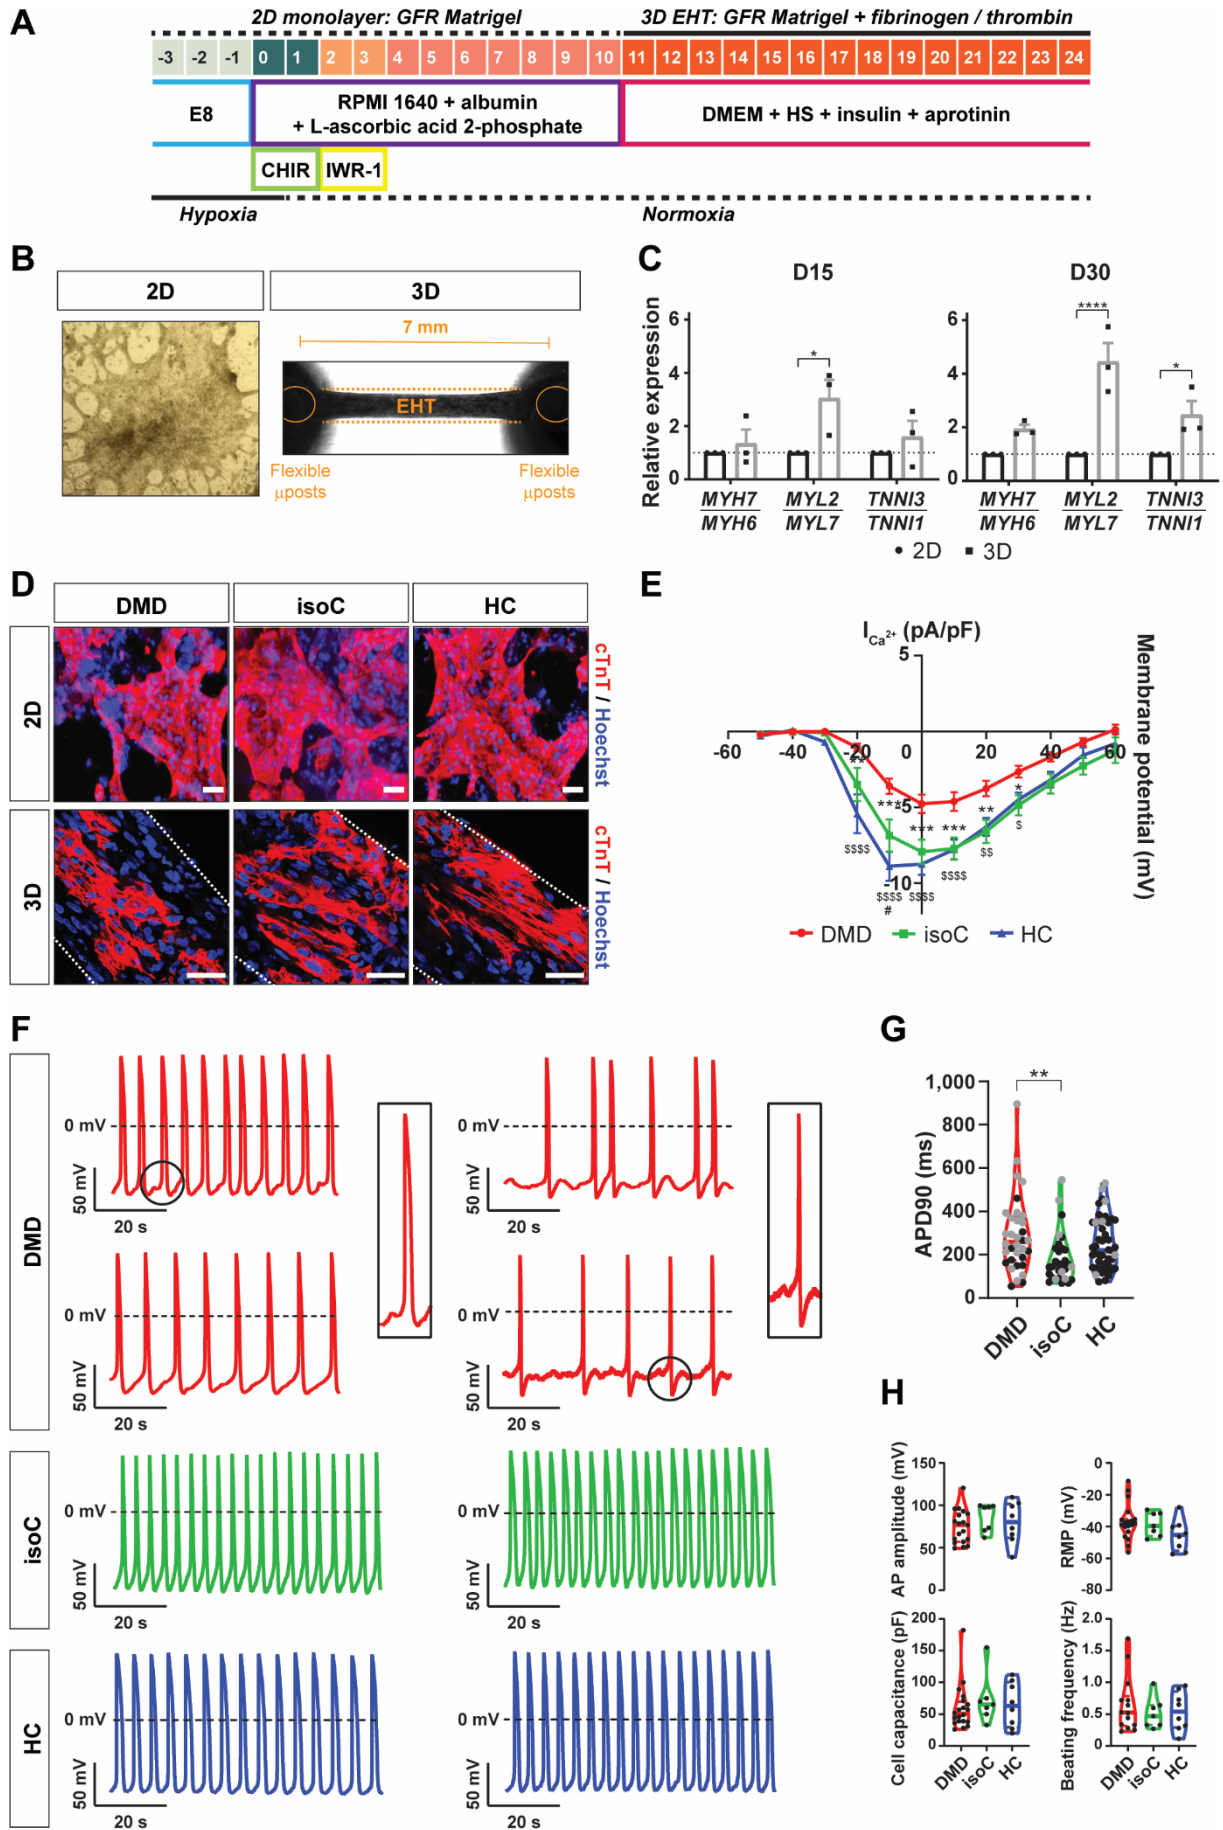



957 **Fig. 2: Characterization of the iPSC-CM differentiation protocol.** (A) Schematic  
958 representation of the cardiac differentiation protocol. Human iPSCs were differentiated to CMs  
959 in a monolayer cardiac differentiation protocol, using chemical Wnt signaling mediators  
960 (CHIR99021 and IWR-1), and, eventually, further matured into 3D EHT constructs based on  
961 fibrinogen and thrombin polymerization. (B) Representative example of 2D monolayer-based  
962 cardiac differentiation (*left panel*) and 3D mini-EHT construct between two flexible microposts,  
963 positioned 7 mm from each other (*right panel*). (C) Normalized gene expression ratios for  
964 isoforms of *Myosin Heavy Chain* (MYH7/MYH6), *Myosin Light Chain* (MYL2/MYL7) and  
965 *Cardiac Troponin I* (TNNI3/TNNI1) after 15 and 30 days of differentiation. Data were  
966 representative of three independent experiments (N = 3) and values were expressed as mean ±  
967 SEM. Significance of the difference was indicated as follows: \*P < 0.05; \*\*P < 0.01; \*\*\*P <  
968 0.001 and \*\*\*\*P < 0.0001. (D) Immunostaining of Cardiac Troponin C (cTnT) positive CMs  
969 (cTnT, red and Hoechst, blue) in monolayer-based cardiac differentiation (2D) or EHT  
970 constructs (3D). White dotted lines indicated the borders of the 3D EHT constructs. Scale bar:  
971 50 μm. (E) Voltage-current relation curve of the L-type Ca<sup>2+</sup> current (pA/pF), assessed after  
972 whole-cell patch-clamp configuration. Data were representative of three independent  
973 experiments (N = 3; DMD: n = 13, DMD isogenic: n = 7, healthy: n = 11) and values were  
974 expressed as mean ± SEM. Significance of the difference was indicated as follows: \*P < 0.05;  
975 \*\*P < 0.01; \*\*\*P < 0.001 and \*\*\*\*P < 0.0001 (DMD vs. DMD isogenic control); or \$P < 0.05;  
976 \$\$P < 0.01; \$\$\$P < 0.001 and \$\$\$P < 0.0001 (DMD vs. healthy control). (F) Representative AP  
977 recordings from DMD and control iPSC-CMs. DMD iPSC-CMs displayed arrhythmogenic  
978 firing pattern including DADs and OPPs. (G) Patch-clamp recordings at day 24 of  
979 differentiation for mean APD90 (ms). Additional measurements were performed with di-4-  
980 ANEPPS (gray dots). (H) Patch-clamp recordings for AP amplitude (mV), RMP (mV), cell  
981 capacitance (pF) and beating frequency (Hz). Data were representative of three independent

982 experiments (N = 3; DMD: n = 19, DMD isogenic: n = 7, healthy: n = 8). Significance of the  
983 difference was indicated as follows: \*P < 0.05; \*\*P < 0.01; \*\*\*P < 0.001 and \*\*\*\*P < 0.0001.

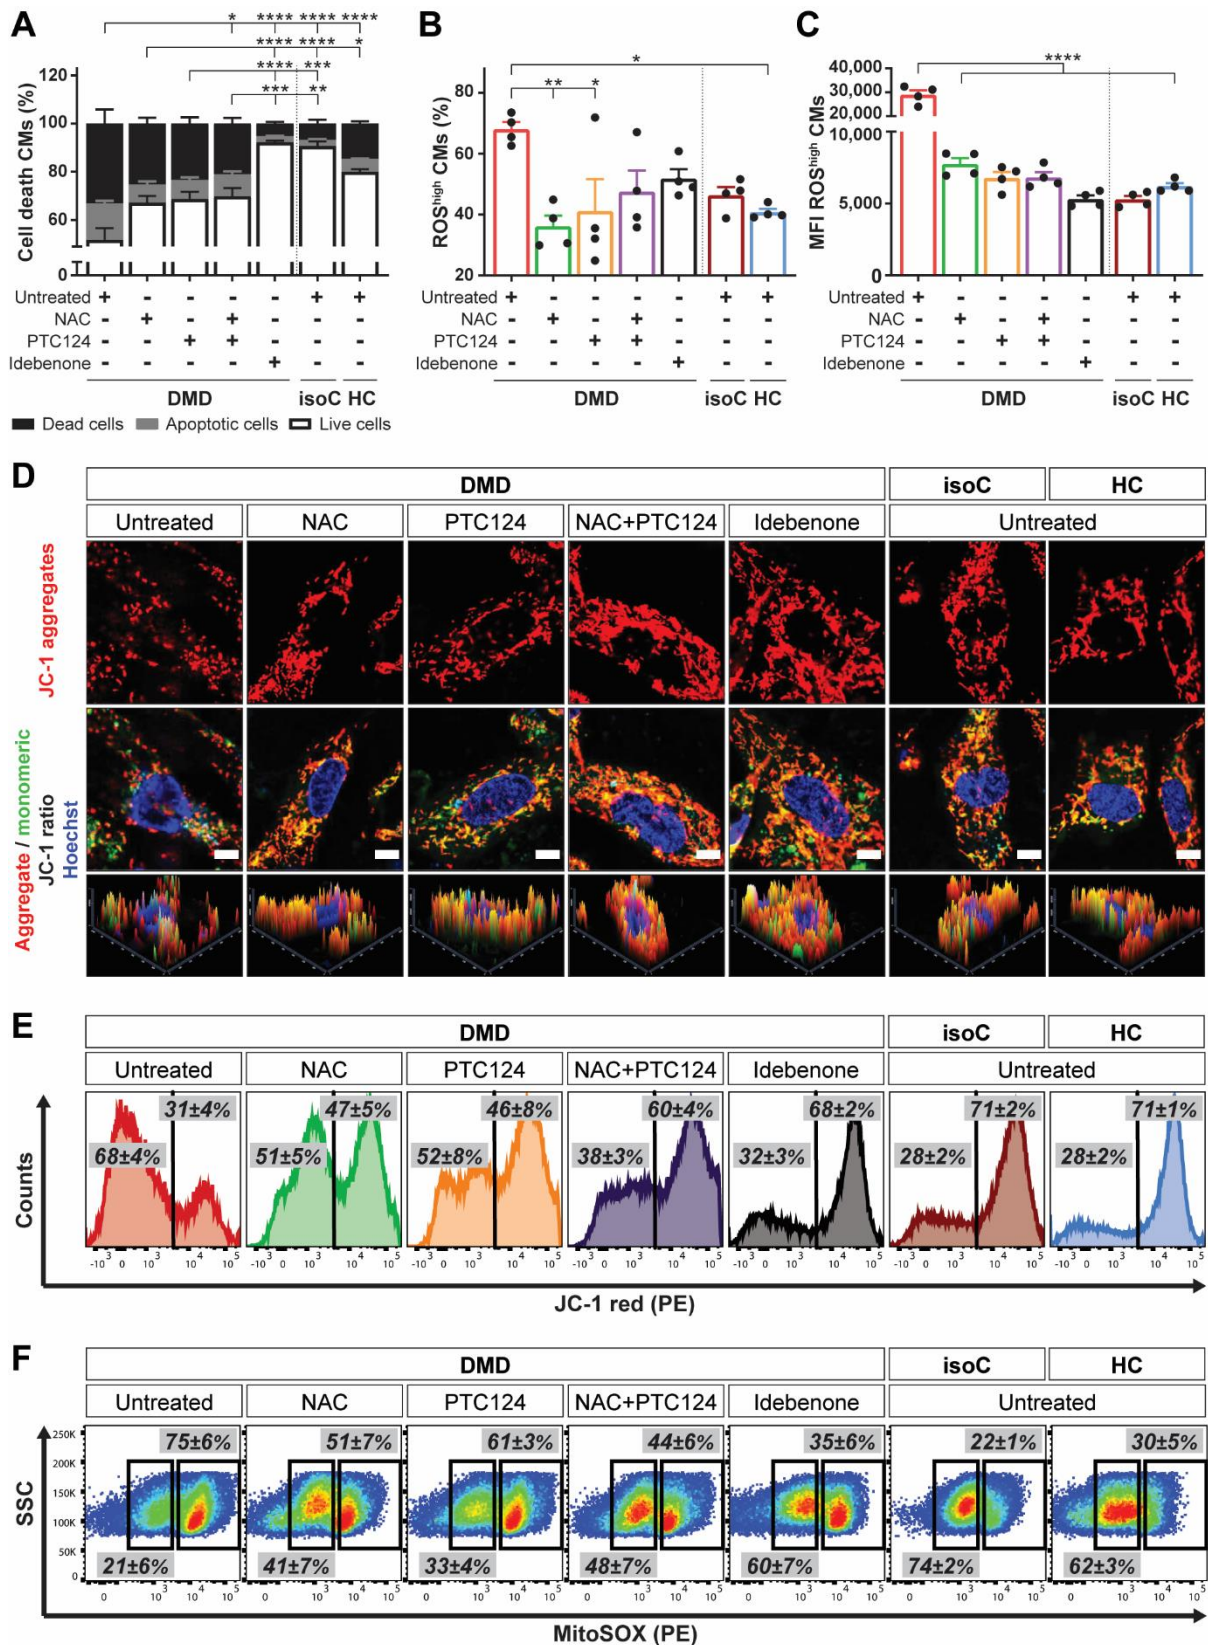

984

985 **Fig. 3: Characterization of the cardiomyopathic phenotype *in vitro* of DMD iPSC-CMs,**

986 **showing premature cell death, depolarized mitochondria and increased intracellular ROS**

987 **levels, which were counteracted by NAC, ataluren (PTC124) and idebenone. Flow**



988 cytometric quantification at day 15 of cardiac differentiation showing the percentage of cell  
989 death of Signal-Regulatory Protein Alpha (SIRPA) positive iPSC-CMs (**A**), the percentage of  
990 CMs with high intracellular ROS levels (**B**) and the MFI of intracellular ROS in CMs (**C**) in  
991 conditions with (NAC, PTC124 and idebenone) or without (untreated) treatments. Data were  
992 representative of four independent experiments (N = 4) and values were reported as mean  $\pm$   
993 SEM. Significance of the difference was indicated as \*P < 0.05; \*\*P < 0.01; \*\*\*P < 0.001 and  
994 \*\*\*\*P < 0.0001. (**D**) Immunostaining of the fluorescent voltage-sensitive dye JC-1 was used to  
995 determine  $\Delta\Psi_m$  and mitochondrial health in 15-day-old differentiated iPSC-CMs. Untreated  
996 DMD iPSC-CMs were characterized by mitochondrial depolarization, as indicated by the  
997 decrease in mitochondrial aggregates (JC-1 red, *upper panels*) and the increase in mitochondrial  
998 monomers (JC-1 green, *middle panels*) in respect to treated DMD iPSC-CMs and controls.  
999 Corresponding histograms (*lower panels*) showed the JC-1 fluorescence intensity ratios  
1000 (aggregates/monomers). Scale bar = 5  $\mu\text{m}$ . (**E**) Representative flow cytometric analyses at day  
1001 15 of differentiation for JC-1 aggregates (PE) and JC-1 monomers (FITC) in DMD iPSC-CMs  
1002 upon treatment. Data were representative of four independent experiments (N = 4). (**F**) Flow  
1003 cytometric analyses at day 15 of differentiation showing the mitochondrial superoxide  
1004 production (MitoSOX, PE) in depolarized DMD mitochondria compared to DMD isogenic and  
1005 healthy controls. Data were representative of four independent experiments (N = 4). Flow  
1006 cytometry data were reported as mean  $\pm$  SEM.

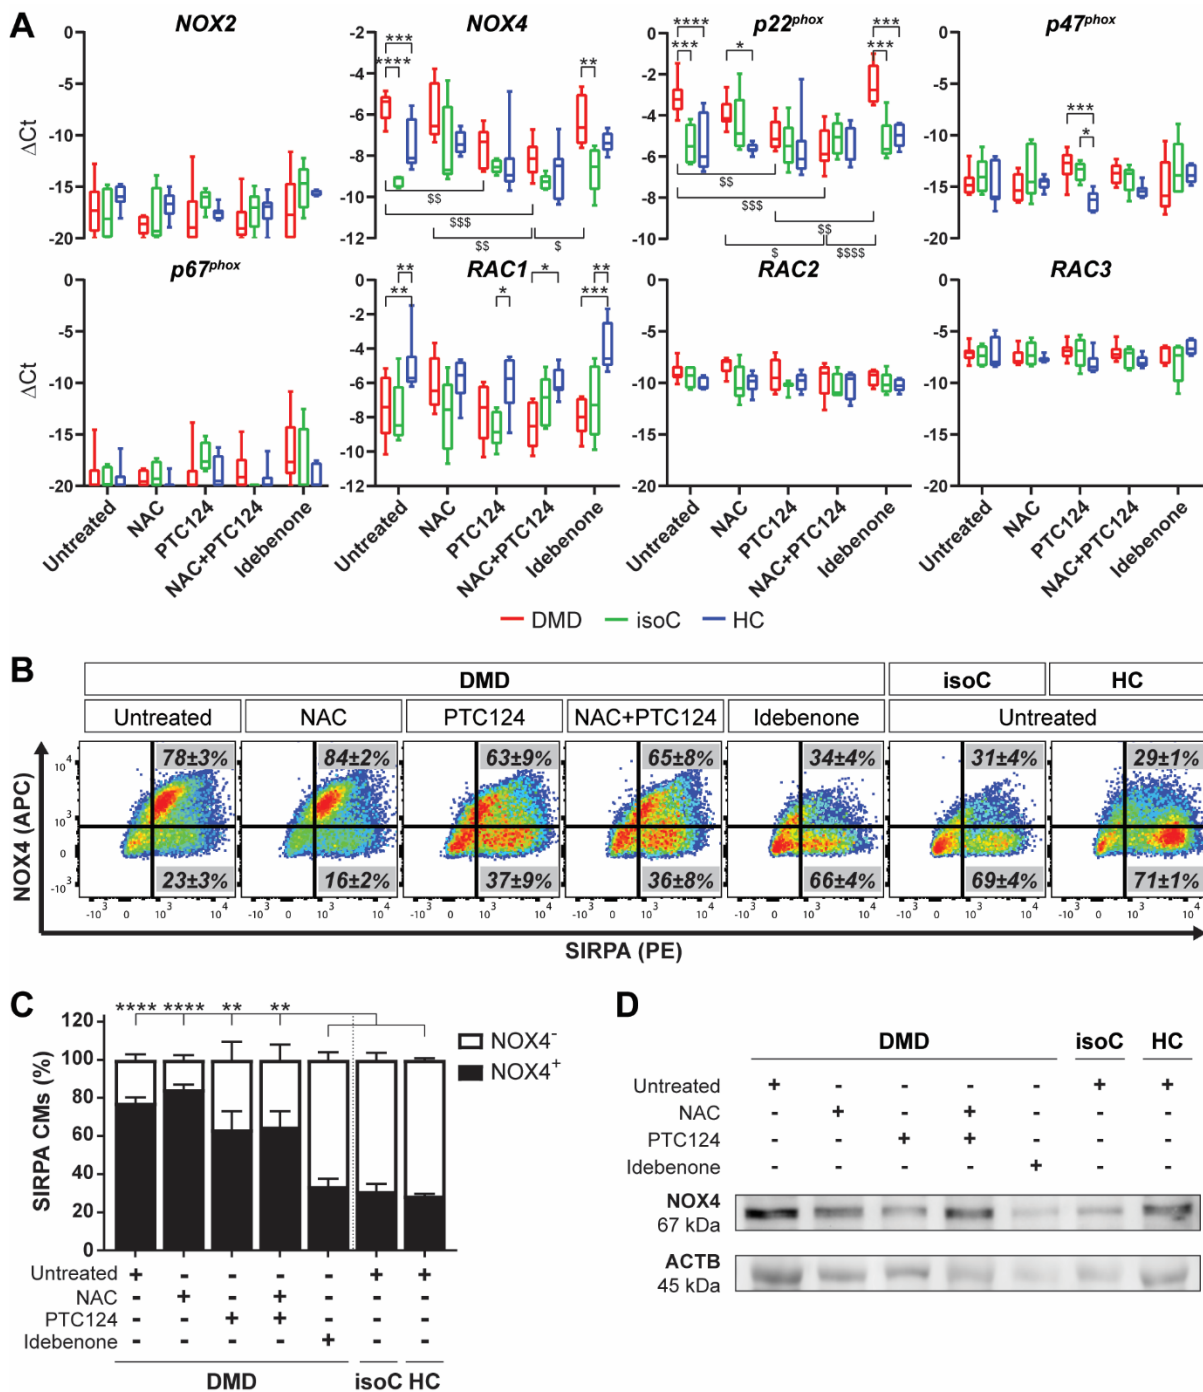

1007

1008 **Fig. 4: Increased expression levels of the ROS-producing NOX family enzyme NOX4 and**

1009 **its accessory regulatory subunit p22<sup>phox</sup> in Dystrophin-Deficient iPSC-CM cultures. (A)**

1010 Gene expression profiles at day 24 of cardiac differentiation of *NOX2* and *NOX4*, and the

1011 regulatory subunits (*p22<sup>phox</sup>*, *p47<sup>phox</sup>*, *p67<sup>phox</sup>*, *RAC1*, *RAC2* and *RAC3*) in DMD, DMD isogenic

1012 and healthy control iPSC-CMs upon treatment with NAC, PTC124 and idebenone. Each data

1013 point was represented as  $\Delta C_t$ , normalized for the housekeeping genes (*GAPDH* and *RPL13a*).

1014 Data were representative of five or more independent experiments ( $N \geq 5$ ) and values were  
1015 expressed as mean  $\pm$  SEM. Significance of the difference was indicated as follows: \* $P < 0.05$ ;  
1016 \*\* $P < 0.01$ ; \*\*\* $P < 0.001$  and \*\*\*\* $P < 0.0001$  vs. subjects within the treatment condition; or  
1017 \$ $P < 0.05$ ; \$\$ $P < 0.01$ ; \$\$\$ $P < 0.001$  and \$\$\$\$ $P < 0.0001$  vs. treatment conditions within the subject  
1018 group. **(B)** Representative flow cytometric analyses at day 15 of differentiation showing the  
1019 percentage of NOX4 (APC) protein expression in SIRPA (PE) positive DMD iPSC-CMs upon  
1020 treatment. Data were representative of three independent experiments ( $N = 3$ ). Flow cytometry  
1021 data were reported as mean  $\pm$  SEM. **(C)** Flow cytometric quantification at day 15 of  
1022 differentiation of the percentage of SIRPA positive iPSC-CMs expressing NOX4 upon  
1023 treatment. Data were representative of three independent experiments ( $N = 3$ ) and values were  
1024 expressed as mean  $\pm$  SEM. Significance of the difference was indicated as follows: \* $P < 0.05$ ;  
1025 \*\* $P < 0.01$ ; \*\*\* $P < 0.001$  and \*\*\*\* $P < 0.0001$ . **(D)** Western blot analysis quantifying the protein  
1026 expression levels of NOX4 in 15-day-old differentiated DMD and control iPSC-CMs,  
1027 normalized to the loading protein ACTB.

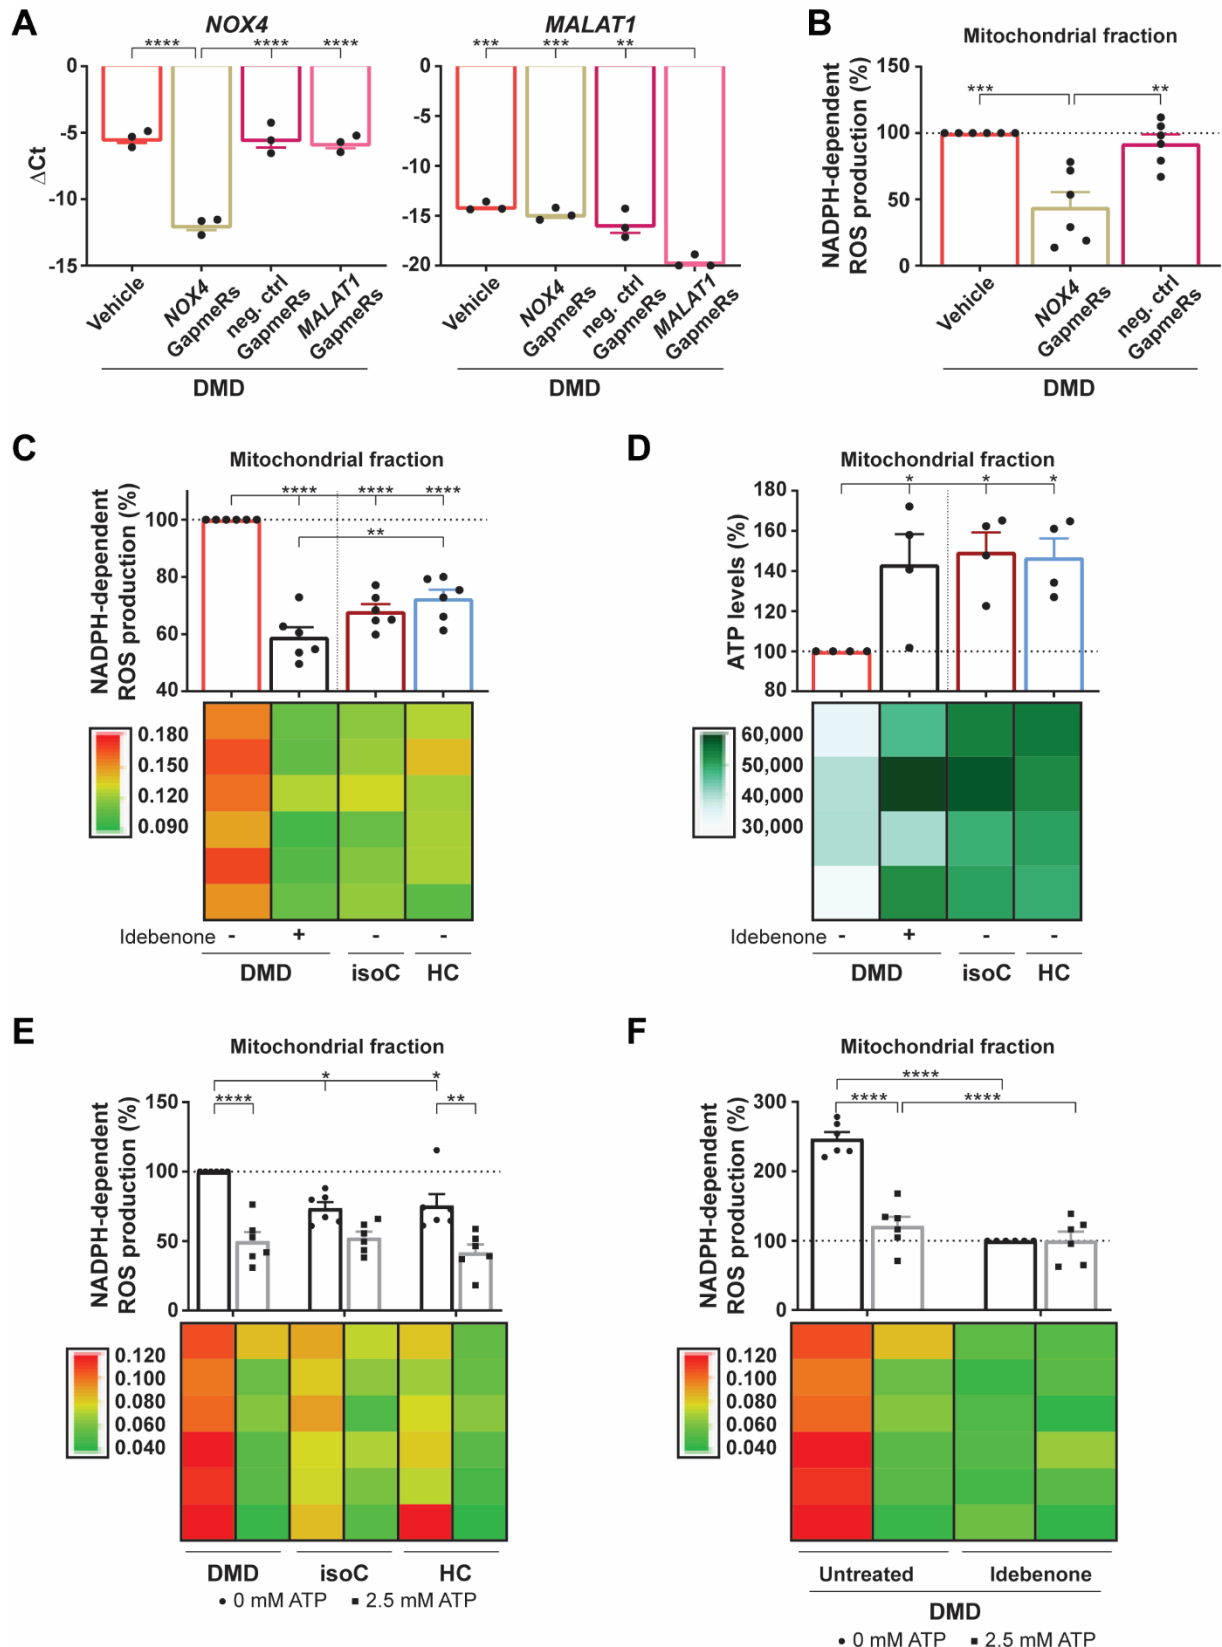

1028

1029 **Fig. 5: Idebenone could counteract the oxidative stress in DMD iPSC-CMs through ATP**

1030 **stimulation of the mitochondrial ETC, which, on its turn, reduced ROS-producing NOX4**

1031 **activity. (A)** Quantitative RT-PCR of *NOX4* gene expression levels after the addition of NOX4  
1032 targeted Antisense LNA GapmeRs to the DMD iPSC-CM cultures (*left panel*). As positive  
1033 control for the efficiency of the Antisense LNA GapmeRs, *MALAT1* levels were determined  
1034 after the addition of MALAT1 targeted Antisense LNA GapmeRs to the DMD iPSC-CM  
1035 cultures (*right panel*). Each data point was represented as  $\Delta$ Ct, normalized for the housekeeping  
1036 genes (*GAPDH* and *RPL13a*). Data were representative of three independent experiments (N =  
1037 3) and values were expressed as mean  $\pm$  SEM. Significance of the difference was indicated as  
1038 follows: \*P < 0.05; \*\*P < 0.01; \*\*\*P < 0.001 and \*\*\*\*P < 0.0001. **(B)** Quantification of the  
1039 NOX4-mediated ROS production, measured via the NADPH-dependent ROS generation, in the  
1040 isolated mitochondrial fraction of DMD iPSC-CMs after a 6 days preincubation with GapmeRs,  
1041 inducing *NOX4* mRNA transient degradation. Each data point was represented as percentage  
1042 (%), normalized to the mitochondrial fraction of the untreated DMD iPSC-CMs (vehicle). **(C)**  
1043 Quantification of the NADPH-dependent ROS production of NOX4 in the mitochondrial  
1044 fraction of DMD iPSC-CMs with or without idebenone treatment compared to DMD isogenic  
1045 and healthy controls. **(D)** ATP luminescence detection showing the effect of idebenone  
1046 treatment on the mitochondrial ATP levels in DMD iPSC-CMs. **(E)** Quantification of the ROS-  
1047 producing NOX4 activity after 2.5 mM ATP addition in DMD iPSC-CM and control cultures.  
1048 Each data point was represented as percentage (%), normalized to the mitochondrial fraction of  
1049 the untreated DMD iPSC-CMs. **(F)** Quantification of the NADPH-dependent ROS production  
1050 of NOX4 in the mitochondrial fraction of DMD iPSC-CMs upon 2.5 mM ATP addition, with  
1051 or without idebenone treatment. Each data point was represented as percentage (%), normalized  
1052 to the mitochondrial fraction of the idebenone-treated DMD iPSC-CM cultures. Data were  
1053 representative of four or six independent experiments (N = 4 or N = 6) and values were  
1054 expressed as mean  $\pm$  SEM. Colored rectangles represented the independent experiments.

1055 Significance of the difference was indicated as follows: \*P < 0.05; \*\*P < 0.01; \*\*\*P < 0.001  
1056 and \*\*\*\*P < 0.0001.

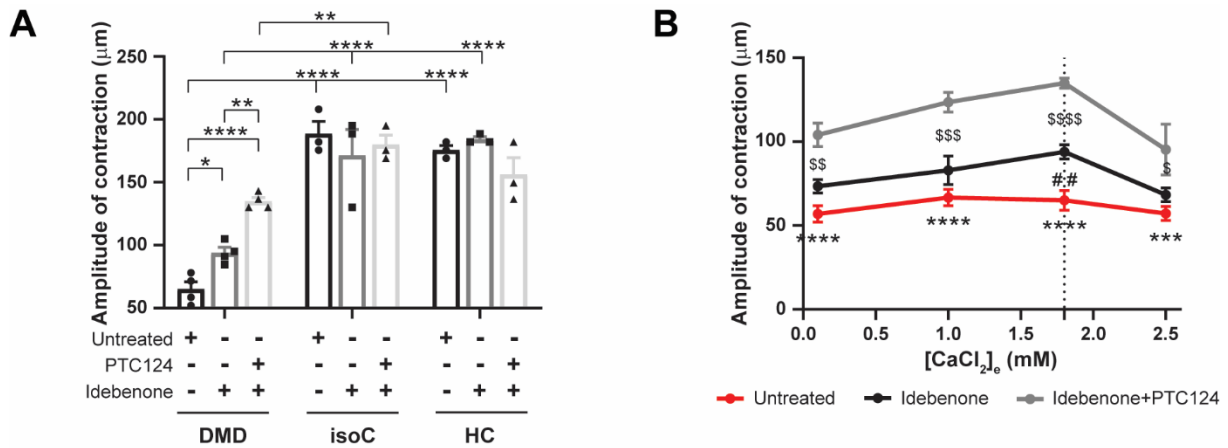

1057

1058 **Fig. 6: Improved contraction of 3D EHT constructs after administration of idebenone**

1059 **alone or idebenone in combination with PTC124 under physiological Ca<sup>2+</sup> levels. (A)**

1060 Spontaneous contraction and relaxation cycles of EHTs were monitored under temperature-

1061 controlled conditions (37°C) at 1.8 mM physiological Ca<sup>2+</sup> concentrations, and measured by

1062 the deflection movements of the microposts (in µm). The effect of idebenone and PTC124 on

1063 the contractility of EHTs derived from DMD iPSC-CMs (EHT diameter in µm: 1,041.9 ± 74.1)

1064 was compared to DMD isogenic (diameter in µm: 938.0 ± 86.6) and healthy control EHTs

1065 (diameter in µm: 849.9 ± 80.5). Data were representative of three or four independent

1066 experiments (N ≥ 3) and values were expressed as mean ± SEM. Significance of the difference

1067 was indicated as follows: \*P < 0.05; \*\*P < 0.01; \*\*\*P < 0.001 and \*\*\*\*P < 0.0001. **(B)** EHTs

1068 derived from DMD iPSC-CMs were incubated with various Ca<sup>2+</sup> concentrations (ranging from

1069 0.1 to 2.5 mM) to assess the amplitude of contraction. Data were representative of three or four

1070 independent experiments (N ≥ 3) and values were expressed as mean ± SEM. Significance of

1071 the difference was indicated as follows: \*P < 0.05; \*\*P < 0.01; \*\*\*P < 0.001 and \*\*\*\*P <

1072 0.0001 (untreated vs. idebenone+PTC124); or \$P < 0.05; \$\$P < 0.01; \$\$\$P < 0.001 and \$\$\$P <

1073 0.0001 (idebenone vs. idebenone+PTC124); or #P < 0.05; ##P < 0.01; ###P < 0.001 and ####P <

1074 0.0001 (untreated vs. idebenone).
